# Supplementary material for: DETECT: DEveloping and testing a model to identify preventive vision loss among older paTients in gEneral praCTice – protocol for a complex intervention in Denmark
Source: PubMed Central journal article supplement — BMJ Open. 2023 May 29;13(5):e069974. doi: 10.1136/bmjopen-2022-069974 (PMC10230986; doi:10.1136/bmjopen-2022-069974), 2023-05-29
Supplement: bmjopen-2022-069974.draft_revisions.pdf [file bmjopen-2022-069974.draft_revisions.pdf]

# BMJ Open

BMJ Open is committed to open peer review. As part of this commitment we make the peer review history of every article we publish publicly available.

When an article is published we post the peer reviewers' comments and the authors' responses online. We also post the versions of the paper that were used during peer review. These are the versions that the peer review comments apply to.

The versions of the paper that follow are the versions that were submitted during the peer review process. They are not the versions of record or the final published versions. They should not be cited or distributed as the published version of this manuscript.

BMJ Open is an open access journal and the full, final, typeset and author-corrected version of record of the manuscript is available on our site with no access controls, subscription charges or pay-per-view fees (<http://bmjopen.bmj.com>).

If you have any questions on BMJ Open's open peer review process please email [info.bmjopen@bmj.com](mailto:info.bmjopen@bmj.com)

# BMJ Open

## **DETECT – Developing and testing a model to identifying vision loss among older patients in general practice: Protocol for a complex intervention aiming at improving health care services and patient support in primary care**

|                               |                                                                                                                                                                                                                                                                                                                                                                                                                                                                                                                                                                                                                                                                                                                                                                                                                                                                                                                                                                                                                                                                                                         |
|-------------------------------|---------------------------------------------------------------------------------------------------------------------------------------------------------------------------------------------------------------------------------------------------------------------------------------------------------------------------------------------------------------------------------------------------------------------------------------------------------------------------------------------------------------------------------------------------------------------------------------------------------------------------------------------------------------------------------------------------------------------------------------------------------------------------------------------------------------------------------------------------------------------------------------------------------------------------------------------------------------------------------------------------------------------------------------------------------------------------------------------------------|
| Journal:                      | <i>BMJ Open</i>                                                                                                                                                                                                                                                                                                                                                                                                                                                                                                                                                                                                                                                                                                                                                                                                                                                                                                                                                                                                                                                                                         |
| Manuscript ID                 | bmjopen-2022-069974                                                                                                                                                                                                                                                                                                                                                                                                                                                                                                                                                                                                                                                                                                                                                                                                                                                                                                                                                                                                                                                                                     |
| Article Type:                 | Protocol                                                                                                                                                                                                                                                                                                                                                                                                                                                                                                                                                                                                                                                                                                                                                                                                                                                                                                                                                                                                                                                                                                |
| Date Submitted by the Author: | 09-Nov-2022                                                                                                                                                                                                                                                                                                                                                                                                                                                                                                                                                                                                                                                                                                                                                                                                                                                                                                                                                                                                                                                                                             |
| Complete List of Authors:     | Sandholdt, Catharina; University of Copenhagen, Section of General Practice, Department of Public Health<br>Jønsson, Alexandra ; Roskilde University, Department of People and Technology; University of Copenhagen, Section of General Practice, Department of Public Health<br>Reventlow, Susanne; Copenhagen University Section of General Practice, Department of Public Health, Copenhagen University<br>De La Cour, Morten; Rigshospitalet Glostrup, Department of Ophthalmology<br>Bach-Holm, Daniella; Rigshospitalet Glostrup, Department of Ophthalmology<br>Line, Kessel; Rigshospitalet Glostrup, Department of Ophthalmology<br>Kolko, Miriam; Rigshospitalet Glostrup, Department of Ophthalmology;<br>University of Copenhagen, Department of Clinical Medicine<br>Jacobsen, Marie ; University of Copenhagen, Section of General Practice, Department of Public Health<br>Mathiesen, Olivia ; University of Copenhagen, Section of General Practice, Department of Public Health<br>Waldorff, Frans; University of Copenhagen, Section of General Practice, Department of Public Health |
| Keywords:                     | Quality in health care < HEALTH SERVICES ADMINISTRATION & MANAGEMENT, OPHTHALMOLOGY, Glaucoma < OPHTHALMOLOGY, PRIMARY CARE, QUALITATIVE RESEARCH, PUBLIC HEALTH                                                                                                                                                                                                                                                                                                                                                                                                                                                                                                                                                                                                                                                                                                                                                                                                                                                                                                                                        |
|                               |                                                                                                                                                                                                                                                                                                                                                                                                                                                                                                                                                                                                                                                                                                                                                                                                                                                                                                                                                                                                                                                                                                         |

SCHOLARONE™  
Manuscripts

1  
2  
3  
4  
5 DETECT – DEveloping and testing a model to identifying vision  
6  
7  
8 loss among older paTients in gEneral praCTice: Protocol for a  
9  
10  
11  
12 complex intervention aiming at improving health care services  
13  
14  
15 and patient support in primary care  
16  
17  
18  
19  
20

21 Authors:

22  
23 Catharina Thiel Sandholdt, casa@sund.ku.dk<sup>1</sup> \*

24 Alexandra Brandt Ryborg Jønsson, ajoensson@ruc.dk<sup>1,4</sup>

25 Susanne Reventlow, susrew@sund.ku.dk<sup>1</sup>

26 Morten Dornonville de la Cour, morten.dornonville.de.la.cour@regionh.dk<sup>2</sup>

27 Daniella Bach-Holm, daniella.bach-holm.01@regionh.dk<sup>2</sup>

28 Line Kessel, line.kessel.01@regionh.dk<sup>2</sup>

29 Miriam Kolko, miriamk@sund.ku.dk<sup>2,3</sup>

30 Marie Honoré Jacobsen, mgr485@sund.ku.dk<sup>1</sup>

31 Olivia Hjulsager Mathiesen, olivia.hjulsager.mathiesen@sund.ku.dk<sup>1</sup>

32 Frans Boch Waldorff, fransw@sund.ku.dk<sup>1</sup>

33  
34  
35  
36  
37  
38  
39  
40  
41  
42  
43 \*Corresponding author

44  
45 1. Department of General Practice, Institute of Public Health, University of Copenhagen, Denmark

46  
47 2. Department of Ophthalmology. Copenhagen University Hospital Rigshospitalet-Glostrup, Denmark

48  
49 3. Department of Clinical Medicine, University of Copenhagen, Denmark

50  
51 4. Department of People and Technology, Roskilde University, Denmark

## Abstract

Introduction: The number of people living with visual impairment and loss is increasing due to sociodemographic changes resulting from an aging population. Visual impairments cause loss in quality of life and reduce self-care abilities. The burden of disease is heavy for people experiencing visual impairment and their relatives. The severity and progression of diseases such as glaucoma and age-related macular degeneration (AMD) are highly dependent on the time of detection and treatment options, making timely access to health-care critical in reducing visual impairment. General practice plays a key role in public health by managing preventive healthcare, diagnostics, and treatment of chronic conditions. General practitioners (GPs) coordinate services from other healthcare professionals. More involvement of the primary sector could potentially be valuable in detecting visual impairment.

Methods: Medical Research Council (MRC) framework for complex interventions to develop a primary care intervention with the GP as a key actor, aimed at identifying and coordinating care for patients with low vision. The development process will engage patients, relatives and relevant health-professional stakeholders. We will pilot test the feasibility of the intervention in a real-world general practice setting. The intervention model will be developed through a participatory approach using qualitative and creative methods such as graphic facilitation. We aim to explore the potentials and limitations of general practice in relation to visual impairment.

Ethics and dissemination: The study meets the requirements from the Helsinki declaration and will be disseminated through research papers and to the broader public through podcasts and patient organizations.

## Strengths and limitations of this study

1. Visual impairment and vision loss are important health problems. But the role of general practice in relation to detection of visual impairment remains unclear. Through the Medical Research Council framework for complex interventions, this study seeks to unfold the potentials and limitations of the GP's role concerning visual impairment and vision loss

- 2.
  - 3.
  - 4.
  - 5.
  - 6.
  - 7.
  - 8.
  - 9.
  - 10.
  - 11.
  - 12.
  - 13.
  - 14.
  - 15.
  - 16.
  - 17.
  - 18.
  - 19.
  - 20.
  - 21.
  - 22.
  - 23.
  - 24.
  - 25.
  - 26.
  - 27.
  - 28.
  - 29.
  - 30.
  - 31.
  - 32.
  - 33.
  - 34.
  - 35.
  - 36.
  - 37.
  - 38.
  - 39.
  - 40.
  - 41.
  - 42.
  - 43.
  - 44.
  - 45.
  - 46.
  - 47.
  - 48.
  - 49.
  - 50.
  - 51.
  - 52.
  - 53.
  - 54.
  - 55.
  - 56.
  - 57.
  - 58.
  - 59.
  - 60.
2. The study applies a participatory approach and explores the method of graphic facilitation to engage patients, relatives, GP's and other health professionals in the development of the intervention
  3. The intervention will be tested in a real-world general practice setting, which will ensure relevance and long-term acceptability of the intervention model
  4. Limitations include that the intervention is in the pilot phase and will need to be tested in a larger scale at a later stage before wider implementation can be initiated

## Introduction

Worldwide the age-standardized rates of preventable blindness have decreased, but age-standardized rates of moderate to severe visual impairment have not (1). It is estimated that 2.2 billion people have impaired vision, and of these, at least 1 billion people have a vision loss that could have been prevented or reduced by earlier detection or by access to treatment (2). The most common causes of moderate to severe visual impairment are uncorrected refractive errors, unoperated cataract, age-related macular degeneration, glaucoma and diabetic retinopathy (1). Also in affluent welfare states, such as Denmark, visual impairment constitutes a problem. Insights from such health care systems may not be directly applicable in less affluent settings, but are likely to point at more general structures that can inform future studies.

The incidence of visual impairment increases with age, and due to the sociodemographic trajectory of an increasing elderly population, the prevalence of patients with visual impairment will increase (3). Timely access to health care has a major influence on the progression of eye conditions (1,2). The consequences of vision loss significantly affect the person's quality of life (4–6), dependence (7) and increases the risk of recurrent falls and fractures, which is a significant threat to mobility in old age (8–12). A YouGov poll showed sight was by far the sensory function people fears losing the most (13). Vision loss can result in worsened mental health (14,15), cognition (16,17) and social functioning (4). Disease progression can be complicated by other chronic conditions (18) and can complicate management of multimorbidity due to decreased self-care, ability to visit clinics and adherence to medication. Finally, vision loss can increase the risks of placement in nursing homes (19,20). Thus, visual impairment and loss has great impact on the individual, their relatives (21,22), society in general and on the healthcare system.

## General practice and visual impairment

GPs handle preventive healthcare, diagnostics, treatment and care of chronic conditions as well as coordinate services from various healthcare professionals (23). In the Global North, the GPs handle the majority of all medical matters. A survey set in English general practice from 1998 concluded that eye problems, including undiagnosed glaucoma and age-related macular generation (AMD), were quite frequent among elderly patients consulting their GP (24). One study found that patients are more likely to have their eyes checked if their GP suggests it (25). Additionally, an increased focus on eye health in at-risk populations in general practice is suggested to be more effective for early detection than broader screening programs (26,27). However, a recent UK-based survey of GPs indicated that although up to five percent of the primary consultations were eye-related, GPs ability to identify red flags was low (28). The literature points to a gap where, even though patients are in contact with their GP concerning symptoms related to their vision, an unidentified number of patients may suffer from unrecognized visual impairment that is not detected in general practice.

## Collaboration across healthcare professions

Since vision problems are rarely detected in general practice, the need for research into how patients and health professionals collaborate to identify and manage visual impairment becomes a relevant matter. This is in line with a recent Cochrane review, which concludes that future research should look at optimized primary care-based vision screening interventions (29). Patients with visual impairment often have contacts with many different healthcare professionals (30). It is therefore important to incorporate collaboration across health professions and sectors in a GP intervention aimed at improving identification of patients with visual impairment.

Optometrists constitute an occupational group who may be the first line of contact for some patients who experience visual changes. Optometrists will in most cases operate independently without a formal collaboration with other health professionals such as GPs (31). Given the optometrists contact with the patients and level of equipment for measuring vision and evaluating the eye, they pose a potentially important resource when collaboration across healthcare professions is rethought and are therefore important to include in the study. Their commercial agenda must be considered when collaborating (32,33) and their work must be validated.

## Aim and objectives

In this study, we aim to develop a health intervention in a Danish general practice setting to improve the detection and care of visual impairment. The patient target group is middle-aged and older

1  
2  
3 adults and their relatives, with GP's constituting the primary professional target group. We define  
4 visual impairment broadly to be the patient experience of symptoms related to vision and symptoms  
5 identified by health professionals – such as reduced vision field – not yet experienced by the patient,  
6  
7 but a serious threat to patient vision. Visual impairment is in this respect not connected to specific  
8 diagnoses, but as previously stated, we assume frequent eye-diseases such as glaucoma and AMD  
9 will be well represented.

10  
11  
12 The overall aim of DETECT is thus to:

- 13 1. Develop an intervention in general practice aimed at identifying visual impairment among  
14 elderly patients with chronic conditions.
  - 15 2. Test the feasibility of the intervention model in general practice with a focus on ensuring  
16 improved patient support and education.
- 17  
18  
19  
20  
21  
22  
23  
24  
25

## 26 Methods and analysis

27  
28 The study will be conducted in Denmark and is thus inscribed in a Scandinavian health system with  
29 universal access to health care. The general health status in Denmark is relatively high, and as far as  
30 vision is concerned, the incidence of legal blindness has decreased along with improved treatment  
31 options (34). The average life expectancy has increased over the last 70 years, which is positive, but  
32 it also entails a rise in age-related sight-threatening eye diseases such as glaucoma and AMD (35).  
33 Despite the decreasing incidence of legal blindness due to AMD, many patients are diagnosed late  
34 with irreversible vision loss. It seems relevant to diagnose eye diseases earlier and optimize the  
35 coordination of care. It is difficult to provide an exact number of people in Denmark who live with  
36 visual impairment. A national survey of health, quality of life and morbidity from 2007 shows that  
37 3.8% of the population over 60 reported difficulties in reading a newspaper text (36), while the  
38 Danish Eye Association estimate that 50.000 people in Denmark above 60 years are blind or visually  
39 impaired (37) (total population 60+: 1.554.542 (38)).

40  
41 In Denmark, the GP is the patient's primary entry point to the healthcare system, and the GP treats  
42 90% of all medical cases (23). All Danes are assigned to a default general practice, and as many as  
43 80% consult their GP at least annually, with an increased frequency among elderly patients aged 50  
44 or older. People over 65 are offered an annual health check at their GP, and a Danish survey from  
45 2019 showed that 82.4% of men and 86.7% of women had their vision measured at one of these  
46 consultations within the last three years (39). However, these figures are from 2010 to 2017. In  
47 2017, regulations regarding driving licenses were changed, resulting in vision being measured only  
48  
49  
50  
51  
52  
53  
54  
55  
56  
57  
58  
59  
60

1  
2  
3 every 15 years. This may result in a lower frequency of vision acuity measurements at the GP today,  
4 but from the 2017 figures we can assume that the practice of performing vision measurements  
5 during the annual consultation for older adults is a well-known procedure.  
6  
7

8  
9 Ophthalmologists can diagnose, treat and carry out the necessary checks of e.g., glaucoma and dry  
10 AMD in the primary sector. If indicated, patients are referred to secondary care in the hospitals' eye  
11 departments. Examples of referral indications may be wet AMD, proliferative diabetic retinopathy  
12 and progressive glaucoma. At the hospitals, ophthalmologists work publicly funded and university  
13 hospital clinics have an obligation to do research within the field.  
14  
15  
16

17  
18 Consultations with the GP or ophthalmologist are free of charge to the patient (40,41). Hospital-  
19 based eye clinics are also free, but the patient must be referred by a primary sector ophthalmologist  
20 for treatment. In cases of acute vision loss or pain, patients can be seen directly in the emergency  
21 room and referred from there to the on-call ophthalmologist in the hospital eye department.  
22  
23 Anyone can book an appointment with the ophthalmologist in the primary sector without a referral,  
24 but due to a low number of ophthalmologists, it is often difficult to book a consultation within a  
25 reasonable time frame and geographical distance. On the other hand, the GP must be available to all  
26 patients inscribed in his/her practice, and have an in-depth knowledge of the patient's general  
27 health and condition. The GPs therefore seem to be in an ideal situation to identify visual  
28 impairment and coordinate the management.  
29  
30  
31  
32  
33  
34

35  
36 It's estimated that around 2000 optometrists operate in Denmark (total population 5,8mill.) and  
37 opticians shops can be found in most smaller cities, making it accessible even in rural areas to visit  
38 an optician shop (42,43). In most optician shops, it is free of charge to have vision tested. Many  
39 optometrists offer intraocular pressure measurements and fundus photographs as additional  
40 procedures for a fee. Optometrists are thus a professional stakeholder that we find interesting to  
41 explore further.  
42  
43  
44  
45  
46  
47

## 48 Study phases

49  
50  
51 The study will apply an exploratory sequential method design by first producing qualitative-based  
52 data to develop a model aimed at identifying visual impairment in a primary care setting. The model  
53 will be tested in general practice for feasibility including a cohort study in general practice to validate  
54 the proof-of-concept.  
55  
56

57 Developing the intervention includes a variety of settings, stakeholders and policy concerns. We  
58 apply the Medical Research Council guidance on developing, testing and evaluating complex  
59  
60



1  
2  
3 interventions (44,45). As a result, we produce a programme theory as part of our theory-driven  
4 intervention, which will guide our feasibility test and evaluation process (46). To operationalize the  
5 framework for complex interventions, we apply a temporal structure from the tradition of human-  
6 centered design to divide the project cycle into the three main phases; (I) identifying the problem,  
7 (II) developing the model and (III) testing the feasibility of the model.(47) We are explicitly reflective  
8 on, how process and product are interwoven and to a very high extent dependent on the context it  
9 unfolds within (44,48).

10  
11 The intervention explores what patients, carers and professionals perceive as pivotal to improve  
12 detection, navigating care and health services and support possibilities for people living with visual  
13 impairment, following a structured and well-documented design process to identify the changes  
14 made and insights produced.

15  
16  
17  
18  
19  
20  
21  
22  
23 [INSERT Figure 1<sup>1</sup>. *Figure 1: DETECT overall study design and participants engaged.*]

## 24 25 26 27 **Phase I: Identify** –Identifying key issues to address in the health intervention through 28 29 30 a participatory process

31  
32 The aim of Phase I is to explore the problem we are addressing. Visual impairment in the middle-  
33 aged and elderly population consists of a variety of diagnoses with cataract, glaucoma, AMD and  
34 diabetic retinopathy being among the most common (1). We are conducting background interviews  
35 with a broad selection of relevant stakeholders to help us map the current practice in detecting and  
36 diagnosing eye conditions and qualify our Phase I data production in phase I.  
37  
38  
39  
40  
41  
42

43 [INSERT figure 2. *Figure 2: Stakeholders identified to participate in a background interview*]

44  
45  
46  
47 An essential element in human-centered design processes is to create understanding and empathy  
48 for the end-user (49,50) – in our case people living with visual impairment and their relatives. We  
49 aim to incorporate a wide spectrum of eye-diagnoses and develop a model to identify and diagnose  
50 visual impairment that works from the onset of the patient's early symptoms, such as stumbling  
51 over doorsteps, difficulties in reading, distorted vision or difficulties related to the transition from  
52 dark to light spaces and vice versa. The intervention aim of increased patient support also includes  
53  
54  
55  
56  
57  
58  
59

---

60 <sup>1</sup> Figures were created with BioRender.com

1  
2  
3 support of relatives, who carries a large part of the burden of the disease and may experience stress  
4 and depression due to their loved one's visual impairment (51).  
5  
6  
7

### 8 *Patient and public involvement in Phase I*

9

10 Patients, relatives and professionals will be involved by providing their perspectives in various stages  
11 of the study and co-design core elements of the model constituting the intervention. The patient  
12 engagement process is informed by a thorough report produced by the Danish Center for Social  
13 Science Research on older adults with visual impairment and vision loss (35). The report underlines  
14 the need for increased knowledge on how visual impairment affects patients' every-day life in all  
15 aspects. The experiences, needs, preferences, and values of patients and relatives will thus be  
16 explored (52). See Figure 1 for an overview of the involvement of participants across the three project  
17 phases.  
18  
19  
20  
21  
22  
23  
24  
25

26 In Phase I, we perform semi-structured interviews with patients and relatives, preferably in their  
27 homes to gain an insight in their experiences in the context in which they occur. Here we focus on  
28 the patient journey from the time patients experience symptoms leading to a diagnosis and handling  
29 life afterwards with a diagnosis. After the interview, patients and relatives are encouraged to contact  
30 the researcher if they would like her/him to participate in e.g., a visit to the ophthalmologist or if  
31 they have further input or concerns at a later stage.  
32  
33  
34  
35

36 We will furthermore perform focus-group interviews with older adults to investigate (1) the  
37 expectations to vision in old age and (2) which health professionals' older adults identify as relevant  
38 when they experience vision changes. The focus-group interviews supplement the interviews with  
39 patient and relative with a view to gaining insight into the social norms and prominent attitudes  
40 towards visual impairment among older adults. The participants in the focus-group interviews are  
41 asked to complete the validated Visual Function Questionnaire-25 to provide more individual  
42 knowledge about the participants own perception of their vision function (53).  
43  
44  
45  
46  
47

48 Through participant observations, we will generate knowledge on the everyday working  
49 environment and challenges that health professionals, private optometrists and communal workers  
50 navigate in concerning people with visual impairment (54).  
51  
52  
53  
54  
55  
56  
57  
58  
59  
60

## Phase II: Develop – Developing an intervention-model for improved detection and support of visual impairment in general practice

In Phase II, we will operationalize the insights from Phase I. This will be done through three consecutive content-developing workshops using the creative method of graphic facilitation (55). Graphic facilitation is well suited when elaborating on ideas and problem-solving processes (56,57). We invite a graphic facilitator to execute three workshops using wall-to-wall paper, where the inputs from the participants are captured and connected during the workshop. Choosing a visual method to engage participants could seem an unusual choice in a project focusing on visual impairment and vision loss. However, the participants are not blind. They live with a visual impairment, which poses a range of consequences and constraints in their every-day life, but it does not prevent them from being able to participate in a graphic facilitated workshop. If needed, relevant aids will be provided – in example to enlarge the graphic recordings on a tablet. The benefits of graphic facilitation includes a transparent process, open to multiple agendas. The method can be relevant for redistributing power and expertise in a co-design activity and the physical product of the three content workshops will act as design principles for the intervention. Project researchers will participate as observers in the three workshops.

The three workshops: Based on the results from phase I, the graphic facilitator and project researchers develop a template for the workshops. Participants for the workshops are recruited among participants in phase I.

### Workshop 1:

In this workshop, the graphic facilitator engages 3-4 patients and 3-4 relatives to formulate a graphic recording on what is lacking in the identification, diagnosis and patient support concerning visual impairment.

### Workshop 2:

The output of the first workshop will form the template for this workshop, where two GP's, two ophthalmologists and two optometrists will co-design possible solutions for the health services concerning visual impairment. Importantly, the health professionals are asked to identify key eye examinations and measures that would be feasible in a general practice setting as well as to identify the most relevant prevalent progressive severe eye diseases. Lastly, a proposal for an organizational structure for the collaboration between the health professionals are formulated.

### Workshop 3:

1  
2  
3 At the last workshop, patients and relatives from the first workshop wrap up the work conducted by  
4 the health professionals and validate the graphic recordings from a patient's and relative's  
5 perspective.  
6  
7

8 The graphic recordings from the three workshops constitute a collective overview of core elements  
9 to include in the intervention-model. The project researchers will recapture the insights and design  
10 the model.  
11  
12  
13

### 14 15 **Phase III: Feasibility– Feasibility test in general practice** 16

#### 17 18 **Part 1:**

19 We will test the model in 2-3 general practices to establish face validity and adjust according to the  
20 experiences. The model must be clinically relevant and feasible for implementation in a clinical  
21 practice. Data production continues in this phase through observational studies and interviews with  
22 GPs to disseminate the experiences with the model in general practice and whether the model can  
23 be part of improved collaboration between health professionals.  
24  
25  
26

#### 27 28 **Part 2:**

29 Based on findings from part 1, we will expand the intervention by including ten to fifteen GP  
30 practices in the Capital and Zealand Region, Denmark to participate in testing the GP's possibilities  
31 and barriers to detect visual impairment and vision loss. According to previous literature (36), we  
32 need to include 1500-2000 patients in general practice aged 65 or older to identify 150-200 with  
33 visual impairment. The practices will receive the developed intervention-model and recruit in up to  
34 18 months. Patients 65+ who consult their GP as part of an annual consultation for a chronic  
35 condition will be informed about the study in the waiting room and asked to complete a  
36 questionnaire in the waiting room based on the validated Visual functioning Questionnaire 25 (53).  
37 The questionnaire measures the dimensions of self-reported vision-targeted health status that are  
38 most important to individuals who have chronic eye diseases. A dedicated staff or GP will examine  
39 the vision according to the guidelines formulated in the model. The specific examination cannot be  
40 reported until the phases I+II have been completed, but we assume that an ordinary vision test,  
41 visual fields and contrast vision as well as a function test will be included.  
42  
43 If visual impairment is detected, the patient will undergo further examinations assessed by an  
44 ophthalmologist. At present time we assume that measurement of the visual acuity, tonometry,  
45 macular- and parapapillary OCT-scans and fundus photographs could be part of the extended  
46 examinations, but this is also part of Phase I+II to establish. This will function as a reference standard  
47 and allow us to study the prevalence of visual impairments as well as eye diseases and study  
48 predictor's for visual impairment as well.  
49  
50  
51  
52  
53  
54  
55  
56  
57  
58  
59  
60

1  
2  
3 Due to the Danish registers, it is possible to follow the cohort for a long period. This follow-up study  
4 is not part of the present project, but will be planned later.  
5  
6  
7

## 8 9 Analysis

10  
11 We will produce a variety of qualitative and quantitative data in the study, which will be analysed  
12 and disseminated accordingly by researchers with extensive experience in qualitative and  
13 quantitative analysis, respectively. The analytical process will be carried out iteratively, which covers  
14 analytical steps taken between each of the three project phases to ensure appropriate adjustments  
15 in the design of the intervention model (58).  
16  
17

18  
19 Ultimo phase I, the empirical data produced in the phase will be analyzed through a thematic  
20 analysis, which will identify the primary issues of concern from all the perspectives of the various  
21 stakeholders (59). The findings from the analysis will form the foundation for the consecutive  
22 content workshops in Phase II.  
23  
24

25  
26 Patients' and relatives' experiences of visual impairment are important to incorporate in the  
27 intervention design, and a macro-analytical approach is therefore pursued in synthesizing the  
28 patients' experience of early signs of vision loss and screening for vision loss, whereby this  
29 information is placed within cross-disciplinary theories. The study will focus on the notion of the loss  
30 of vision, highlighting the intricate encounters of individual senses, clinical practice, cross-sectorial  
31 collaborations and political health-economies. This macro-focus is complemented by attention to  
32 the micro-interactional processes of daily life (60). Here, the study will be adding a  
33 phenomenological theoretical (61) locus on the individual grounded in specific perceptions and  
34 bodily experiences (62) and the immediate struggle in the face of vision loss.  
35  
36  
37  
38  
39  
40

41  
42 In Phase III, the analysis of the feasibility study in general practice will be structured according to the  
43 programme theory to identify how and if the activities in the intervention model lead to the  
44 intended outputs and outcomes (63).  
45  
46  
47

48  
49 All formal interviews will be audio-recorded and transcribed following a project guideline to ensure  
50 uniformity. The three phases will produce observations and informal talks, which will be  
51 documented through field-notes and pictures. The qualitative data will be analyzed thematically  
52 (59,64) with special attention to how the daily practice of care and clinical work is performed and  
53 the social interactions they encompass (65,66). The three workshops in Phase II will be documented  
54 through graphic facilitation, researcher field-notes and pictures.  
55  
56  
57

58  
59 The questions in the questionnaire for the feasibility test will be chosen based on the insights from  
60 Phase I+II to ensure relevance and accuracy.

## Ethics and dissemination

Ethical issues will be a primary consideration at all levels of the study both when involving patients in the participatory design and during the cohort-study. The study is registered in the records of research projects containing personal data at University of Copenhagen (J.nr: 514-0701/22-3000). It will be conducted according to the ethical standards of the Helsinki Declaration and GDPR-legislation.

In data production, all participants will be asked to read and sign a consent form regarding their specific participation and kind of information, including how we will handle the information provided to us as, well as information on how to withdraw consent at a later stage. In the qualitative data production, we will produce photographic and graphic material, which requires further ethical reflections in terms of anonymization.

The cohort study involves a risk of over-diagnostic practice due to the tests and screening involved (67). Any potential harms, over-diagnosis, labelling effect and consequences of receiving the intervention will be scrutinized during Phase 1+2+3 (68). Age-related visual impairment diagnoses including glaucoma and AMD meet the requirements for screening formulated by WHO (69).

During the analysis, both benefits and harms of the intervention will be investigated and presented as results. Results will be published in peer-reviewed journals, preferably open-access. Patients, relatives and health professionals are invited in as co-authors where relevant. We will present our results in relevant fora nationally and internationally (conferences, annual meetings, etc).

Additionally, we will organize a symposium directed at stakeholders from health and social care sector and employers. The participants from the three content-developing workshops in Phase II will be invited to participate in the symposia and share their experiences of being part of the research process. For communication to lay persons, we will produce a podcast on sensory loss in old age focused on vision and participate in the yearly Danish democracy and community festival "*Folkemødet*", which has a specific focus on communicating public health science.

The proposed study is relevant for ensuring kind and empathic care (70,71) with time to guide and comfort patients (72). This requires knowledge about how the patient experiences visual impairment as well as identification of the current challenges in the health services provided, which we aim to improve following the DETECT intervention. Specifically relevant in this study is the focus on general practice in relation to visual impairment, which is currently an understudied area.

## Implications

Collectively, the output of intervention will help us understand, how to support and treat patients with impaired vision and to define an expedient role for general practice. In this respect, adding knowledge on the GP perspective will strengthen the feasibility of the intervention. The development of a co-designed intervention aimed at both patients and GPs can have an important impact on the delivered quality in the diagnosis and management of patients with visual impairment in primary care.

## Authors Contributions

FBW, ABRJ, SR & CTS developed the original idea for the study. CTS wrote first draft of the protocol. CTS, ABRJ, SR, FBW, MHJ & OHM were primary in developing the methodological framework for the study. DBH, MDC, LK & MK provided detailed information regarding clinical procedures and ophthalmological expertise. MHJ & FBW performed the initial literature search. All authors critically reviewed and revised the initial draft and approved the final version of the manuscript.

## Conflicts of interest

None to declare

## Funding

This work was supported by The Velux Foundation, grant number: 869353

## References

1. Steinmetz JD, Bourne RR, Briant PS, Flaxman SR, Taylor HR, Jonas JB, et al. Causes of blindness and vision impairment in 2020 and trends over 30 years, and prevalence of avoidable blindness in relation to VISION 2020: the Right to Sight: an analysis for the Global Burden of Disease Study. *The Lancet Global Health*. 2021;9(2):e144–60.
2. World Health Organization. World report on vision. 2019;
3. Brown GC, Brown MM, Sharma S, Stein JD, Roth Z, Campanella J, et al. The burden of age-related macular degeneration: a value-based medicine analysis. *Trans Am Ophthalmol Soc*.

2005;103:14.

4. Hajek A, Brettschneider C, Lüthmann D, Eisele M, Mamone S, Wiese B, et al. Does visual impairment affect social ties in late life? Findings of a multicenter prospective cohort study in Germany. *The journal of nutrition, health & aging*. 2017;21(6):692–8.
5. Lamoureux E, Pesudovs K. Vision-specific quality-of-life research: a need to improve the quality. *American journal of ophthalmology*. 2011;151(2):195–7.
6. Langelan M, De Boer MR, Van Nispen RM, Wouters B, Moll AC, Van Rens GH. Impact of visual impairment on quality of life: a comparison with quality of life in the general population and with other chronic conditions. *Ophthalmic epidemiology*. 2007;14(3):119–26.
7. Brown JC, Goldstein JE, Chan TL, Massof R, Ramulu P, Low Vision Research Network Study Group. Characterizing functional complaints in patients seeking outpatient low-vision services in the United States. *Ophthalmology*. 2014;121(8):1655–62.
8. Swenor BK, Munoz B, West SK. Does visual impairment affect mobility over time? The Salisbury Eye Evaluation Study. *Investigative ophthalmology & visual science*. 2013;54(12):7683–90.
9. de Boer MR, Pluijm SM, Lips P, Moll AC, Völker-Dieben HJ, Deeg DJ, et al. Different aspects of visual impairment as risk factors for falls and fractures in older men and women. *Journal of bone and Mineral Research*. 2004;19(9):1539–47.
10. Lord SR. Visual risk factors for falls in older people. *Age and ageing*. 2006;35(suppl\_2):ii42–5.
11. Crews JE, Chou CF, Stevens JA, Saaddine JB. Falls among persons aged  $\geq 65$  years with and without severe vision impairment—United States, 2014. *Morbidity and Mortality Weekly Report*. 2016;65(17):433–7.
12. Tseng VL, Yu F, Lum F, Coleman AL. Risk of fractures following cataract surgery in Medicare beneficiaries. *Jama*. 2012;308(5):493–501.
13. Hoang Nguyen. Of the five senses, a majority would miss sight the most [Internet]. YouGovAmerica. 2018 [cited 2022 Oct 3]. Available from: <https://today.yougov.com/topics/health/articles-reports/2018/07/25/five-senses-majority-would-miss-sight-most>
14. Kempen GI, Ballemans J, Ranchor AV, van Rens GH, Zijlstra G. The impact of low vision on activities of daily living, symptoms of depression, feelings of anxiety and social support in community-living older adults seeking vision rehabilitation services. *Quality of life research*. 2012;21(8):1405–11.
15. Rees G, Tee HW, Marella M, Fenwick E, Dirani M, Lamoureux EL. Vision-specific distress and depressive symptoms in people with vision impairment. *Investigative ophthalmology & visual science*. 2010;51(6):2891–6.
16. Lin M, Gutierrez P, Stone K, Yaffe K, Ensrud K, Fink H, et al. Vision impairment and combined vision and hearing impairment predict cognitive and functional decline among older women. *JOURNAL OF GENERAL INTERNAL MEDICINE*. 2002;17:179–179.
17. Reyes-Ortiz CA, Kuo Y, DiNuzzo AR, Ray LA, Raji MA, Markides KS. Near vision impairment predicts cognitive decline: data from the Hispanic Established Populations for Epidemiologic Studies of the Elderly. *Journal of the American Geriatrics Society*. 2005;53(4):681–6.



18. Anderson G, Horvath J. The growing burden of chronic disease in America. *Public health reports*. 2004;119(3):263–70.
19. Hajek A, Brettschneider C, Lange C, Posselt T, Wiese B, Steinmann S, et al. Longitudinal predictors of institutionalization in old age. *PloS one*. 2015;10(12):e0144203.
20. Wang JJ, Mitchell P, Cumming RG, Smith W. Visual impairment and nursing home placement in older Australians: the Blue Mountains Eye Study. *Ophthalmic epidemiology*. 2003;10(1):3–13.
21. Hanemoto T, Hikichi Y, Kikuchi N, Kozawa T. The impact of different anti-vascular endothelial growth factor treatment regimens on reducing burden for caregivers and patients with wet age-related macular degeneration in a single-center real-world Japanese setting. *PloS one*. 2017;12(12):e0189035.
22. Spooner KL, Mhlanga CT, Hong TH, Broadhead GK, Chang AA. The burden of neovascular age-related macular degeneration: a patient’s perspective. *Clinical Ophthalmology (Auckland, NZ)*. 2018;12:2483.
23. Pedersen KM, Andersen JS, Søndergaard J. General practice and primary health care in Denmark. *The Journal of the American Board of Family Medicine*. 2012;25(Suppl 1):S34–8.
24. Reidy A, Minassian D, Vafidis G, Joseph J, Farrow S, Wu J, et al. Prevalence of serious eye disease and visual impairment in a north London population: population based, cross sectional study. *Bmj*. 1998;316(7145):1643–6.
25. Ammary-Risch NJ, Huang S. The primary care physician’s role in preventing vision loss and blindness in patients with diabetes. *Journal of the National Medical Association*. 2011;103(3):281–3.
26. Rowe S, MacLean CH, Shekelle PG. Preventing visual loss from chronic eye disease in primary care: scientific review. *Jama*. 2004;291(12):1487–95.
27. Stein JD, Khawaja AP, Weizer JS. Glaucoma in adults—Screening, diagnosis, and management: A review. *Jama*. 2021;325(2):164–74.
28. Kilduff C, Lois C. Red eyes and red-flags: improving ophthalmic assessment and referral in primary care. *BMJ Open Quality*. 2016;5(1):u211608-w4680.
29. Clarke EL, Evans JR, Smeeth L. Community screening for visual impairment in older people. *Cochrane database of systematic reviews*. 2018;(2).
30. Harper RA, Gunn PJ, Spry PG, Fenerty CH, Lawrenson JG. Care pathways for glaucoma detection and monitoring in the UK. *Eye*. 2020;34(1):89–102.
31. Loughman J, Nolan J, Stack J, Beatty S. Online AMD research study for optometrists: current practice in the Republic of Ireland and UK. *Optometry in Practice*. 2011;12(4):135–44.
32. Townsend D, Reeves B, Taylor J, Chakravarthy U, O’Reilly D, Hogg R, et al. Health professionals’ and service users’ perspectives of shared care for monitoring wet age-related macular degeneration: a qualitative study alongside the ECHoES trial. *BMJ open*. 2015;5(4):e007400.
33. Shickle D, Griffin M. Why don’t older adults in England go to have their eyes examined? *Ophthalmic and Physiological Optics*. 2014;34(1):38–45.
34. Høeg TB, Ellervik C, Buch H, La Cour M, Klemp K, Kvetny J, et al. Danish Rural Eye Study: epidemiology of adult visual impairment. *Ophthalmic epidemiology*. 2016;23(1):53–62.
35. Anna Amilon, Maria Lomborg Røgeskov, Juliane Birkedal Poulsen, Anu Siren, Rikke Nøhr

- 1  
2  
3 Brünner. Ældre med Synstab (older adults with vision loss) [Internet]. VIVE, The Danish Center for  
4 Social Research; 2021 [cited 2022 Apr 27]. Available from:  
5 <https://www.vive.dk/da/udgivelser/aeldre-med-synstab-15830/>  
6
- 7 36. Ekholm O, Kjølner M, Davidsen M, Hesse U, Eriksen L, Christensen AI, et al. Sundhed og  
8 sygelighed i Danmark & udviklingen siden 1987. 2007;  
9
- 10 37. Øjenforeningen (The Danish Eye Association) [Internet]. [cited 2022 Nov 3]. Available from:  
11 <https://ojenforeningen.dk/>  
12
- 13 38. Danmarks Statistik (Danish Statistics). Statistikbanken [Internet]. [cited 2022 Jun 29].  
14 Available from: <https://www.statistikbanken.dk/FOLK1AM>  
15
- 16 39. Sundhedsstyrelsen. Ældres Sundhed OG Trivsel. Sundhedsstyrelsen. 2019;6–108.  
17
- 18 40. Krasnik A, Vallgård S, Christiansen T, Høyer KL. Sundhedsvæsen og sundhedspolitik.  
19 Munksgaard Danmark; 2010.
- 20 41. Wadmann S, Strandberg-Larsen M, Vrangbæk K. Coordination between primary and  
21 secondary healthcare in Denmark and Sweden. *International journal of integrated care*. 2009;9.  
22
- 23 42. The Danish Trade Organisation for Opticians. Om Optikerforeningen (about the Danish Trade  
24 Organisation for Opticians) [Internet]. [cited 2022 Jun 29]. Available from:  
25 <https://www.optikerforeningen.dk/om-optikerforeningen/>  
26
- 27 43. Da optikerne blev til optometriste | Øjenforeningens medlemsblad: Værn om Synet (When  
28 opticians became optometrists | The Danish Eye Association Magazine) [Internet]. [cited 2022 Nov  
29 3]. Available from: <https://ojenforeningen.dk/artikler/optikerne-blev-til-optometriste>  
30
- 31 44. Skivington K, Matthews L, Simpson SA, Craig P, Baird J, Blazeby JM, et al. A new  
32 framework for developing and evaluating complex interventions: update of Medical Research Council  
33 guidance. *bmj*. 2021;374.  
34
- 35 45. Lemire S, Kwako A, Nielsen SB, Christie CA, Donaldson SI, Leeuw FL. What is this thing  
36 called a mechanism? Findings from a review of realist evaluations. *New Directions for Evaluation*.  
37 2020;2020(167):73–86.  
38
- 39 46. Byng R, Norman I, Redfern S. Using realistic evaluation to evaluate a practice-level  
40 intervention to improve primary healthcare for patients with long-term mental illness. *Evaluation*.  
41 2005;11(1):69–93.  
42
- 43 47. Sandholdt CT, Cunningham J, Westendorp RG, Kristiansen M. Towards inclusive healthcare  
44 delivery: potentials and challenges of human-centred design in health innovation processes to increase  
45 healthy aging. *International Journal of Environmental Research and Public Health*. 2020;17(12):4551.  
46
- 47 48. Craig P, Di Ruggiero E, Frolich KL, Mykhalovskiy E, White M, Campbell R, et al. Taking  
48 account of context in population health intervention research: guidance for producers, users and  
49 funders of research. 2018;  
50
- 51 49. Bovaird T, Loeffler E. The role of co-production for better health and wellbeing: why we  
52 need to change. E Loeffler, G Power, T Bovaird, and F Hine-Hughes, editors *Co-production of health  
53 and wellbeing in Scotland Governance International*, Birmingham, UK. 2013;20–8.  
54
- 55 50. Witteman HO, Dansokho SC, Colquhoun H, Coulter A, Dugas M, Fagerlin A, et al. User-  
56 centered design and the development of patient decision aids: protocol for a systematic review.  
57 *Systematic reviews*. 2015;4(1):11.  
58
- 59 51. Amilon A, Siren A. The link between vision impairment and depressive symptomatology in  
60

1  
2  
3 late life: does having a partner matter? *European Journal of Ageing*. 2021;1–12.  
4

5 52. Bate P, Robert G. Experience-based design: from redesigning the system around the patient to  
6 co-designing services with the patient. *BMJ Quality & Safety*. 2006;15(5):307–10.  
7

8 53. Sørensen MS, Andersen S, Henningsen GO, Larsen CT, Sørensen TL. Danish version of  
9 Visual Function Questionnaire-25 and its use in age-related macular degeneration. *Dan Med Bull*.  
10 2011;58(6):A4290.  
11

12 54. Spradley JP. *Participant Observation*. USA: Waveland Press; 2016. 207 p. [reissue of original  
13 publication: 1980]  
14

15 55. Sandholdt CT, Srivarathan A, Kristiansen M, Malling GMH, Olesen KVM, Jeppesen M, et al.  
16 Undertaking graphic facilitation to enable participation in health promotion interventions in  
17 disadvantaged neighbourhoods in Denmark. *Health Promotion International*.  
18 2022;37(Supplement\_2):ii48–ii47.  
19

20 56. Espiner D, Hartnett F. Innovation and graphic facilitation. *Aotearoa New Zealand Social*  
21 *Work*. 2016;28(4):44–53.  
22

23 57. Hautopp H, Ørngreen R. A review of graphic facilitation in organizational and educational  
24 contexts. *Designs for Learning*. 2018;10(1):53–62.  
25

26 58. Papoutsis C, Wherton J, Shaw S, Morrison C, Greenhalgh T. Putting the social back into  
27 sociotechnical: Case studies of co-design in digital health. *Journal of the American Medical*  
28 *Informatics Association*. 2021;28(2):284–93.  
29

30 59. Braun V, Clarke V. Using thematic analysis in psychology. *Qualitative Research in*  
31 *Psychology*. 2006 Jan;3(2):77–101.  
32

33 60. Goodwin C. Participation, stance and affect in the organization of activities. *Discourse &*  
34 *Society*. 2007;18(1):53–73.  
35

36 61. Knibbe K, Versteeg P. Assessing phenomenology in anthropology: Lessons from the study of  
37 religion and experience. *Critique of Anthropology*. 2008;28(1):47–62.  
38

39 62. Biehl J, Petryna A. *When people come first: critical studies in global health*. Princeton  
40 University Press; 2013.  
41

42 63. Garn SD, Glümer C, Villadsen SF, Malling GMH, Christensen U. Understanding the  
43 mechanisms generating outcomes in a Danish peer support intervention for socially vulnerable people  
44 with type 2-diabetes: a realist evaluation. *Archives of Public Health*. 2021;79(1):1–12.  
45

46 64. Pope C, Ziebland S, Mays N. Analysing qualitative data. *Bmj*. 2000;320(7227):114–6.  
47

48 65. Halkier B, Jensen I. Methodological challenges in using practice theory in consumption  
49 research. Examples from a study on handling nutritional contestations of food consumption. *Journal*  
50 *of Consumer Culture*. 2011;11(1):101–23.  
51

52 66. Halkier B, Holm L. Linking socioeconomic disadvantage to healthiness of food practices:  
53 Can a practice-theoretical perspective sharpen everyday life analysis? *Sociology of Health & Illness*.  
54 2021;43(3):750–63.  
55

56 67. Brodersen J, Jorgensen KJ, Gotzsche PC. The benefits and harms of screening for cancer with  
57 a focus on breast screening. *Pol Arch Med Wewn*. 2010;120(3):89–94.  
58

59 68. Bonell C, Jamal F, Melendez-Torres G, Cummins S. ‘Dark logic’: theorising the harmful  
60 consequences of public health interventions. *J Epidemiol Community Health*. 2015;69(1):95–8.

- 1  
2  
3 69. World Health Organization. Screening programmes: a short guide. Increase effectiveness,  
4 maximize benefits and minimize harm. 2020;  
5  
6 70. Kristiansen M. The difference that kind and compassionate care makes. *BMJ* (online). 2018;  
7  
8 71. Montori VM. Turning away from industrial health care toward careful and kind care.  
9 *Academic Medicine*. 2019;94(6):768–70.  
10  
11 72. Pieterse AH, Stiggelbout AM, Montori VM. Shared decision making and the importance of  
12 time. *Jama*. 2019;322(1):25–6.  
13  
14  
15  
16  
17  
18  
19  
20  
21  
22  
23  
24  
25  
26  
27  
28  
29  
30  
31  
32  
33  
34  
35  
36  
37  
38  
39  
40  
41  
42  
43  
44  
45  
46  
47  
48  
49  
50  
51  
52  
53  
54  
55  
56  
57  
58  
59  
60

For peer review only

1  
2  
3  
4  
5  
6  
7  
8  
9  
10  
11  
12  
13  
14  
15  
16  
17  
18  
19  
20  
21  
22  
23  
24  
25  
26  
27  
28  
29  
30  
31  
32  
33  
34  
35  
36  
37  
38  
39  
40  
41  
42  
43  
44  
45  
46  
47  
48  
49  
50  
51  
52  
53  
54  
55  
56  
57  
58  
59  
60

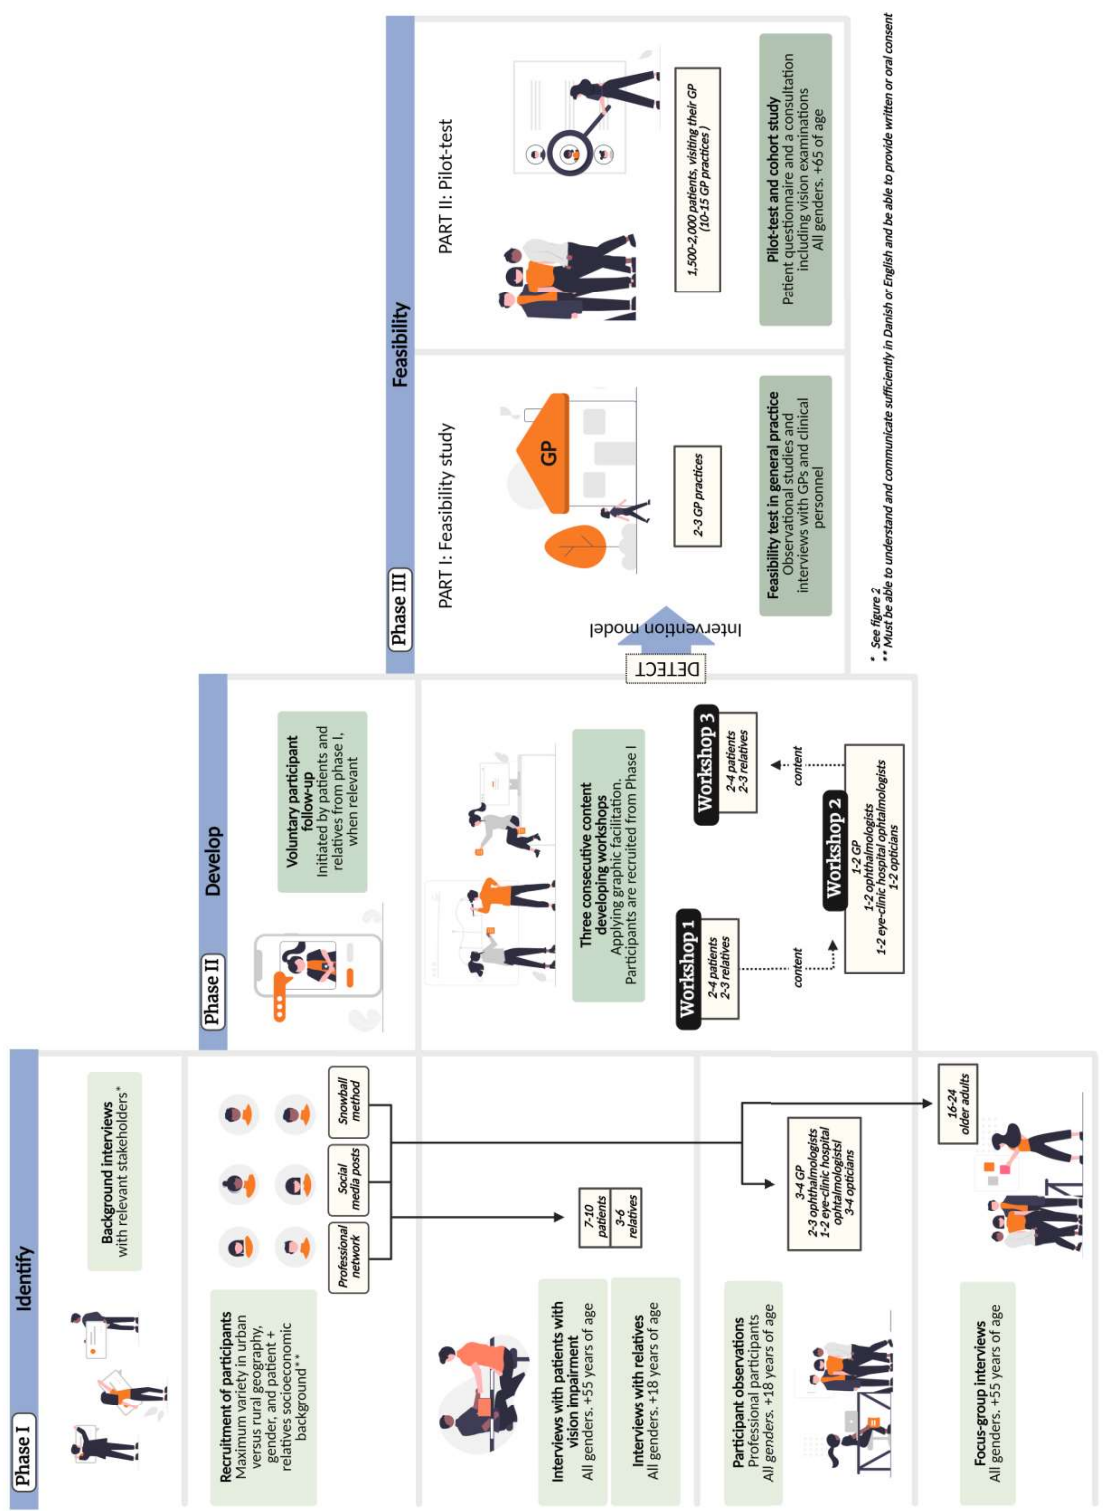

1  
2  
3  
4  
5  
6  
7  
8  
9  
10  
11  
12  
13  
14  
15  
16  
17  
18  
19  
20  
21  
22  
23  
24  
25  
26  
27  
28  
29  
30  
31  
32  
33  
34  
35  
36  
37  
38  
39  
40  
41  
42  
43  
44  
45  
46  
47  
48  
49  
50  
51  
52  
53  
54  
55  
56  
57  
58  
59  
60

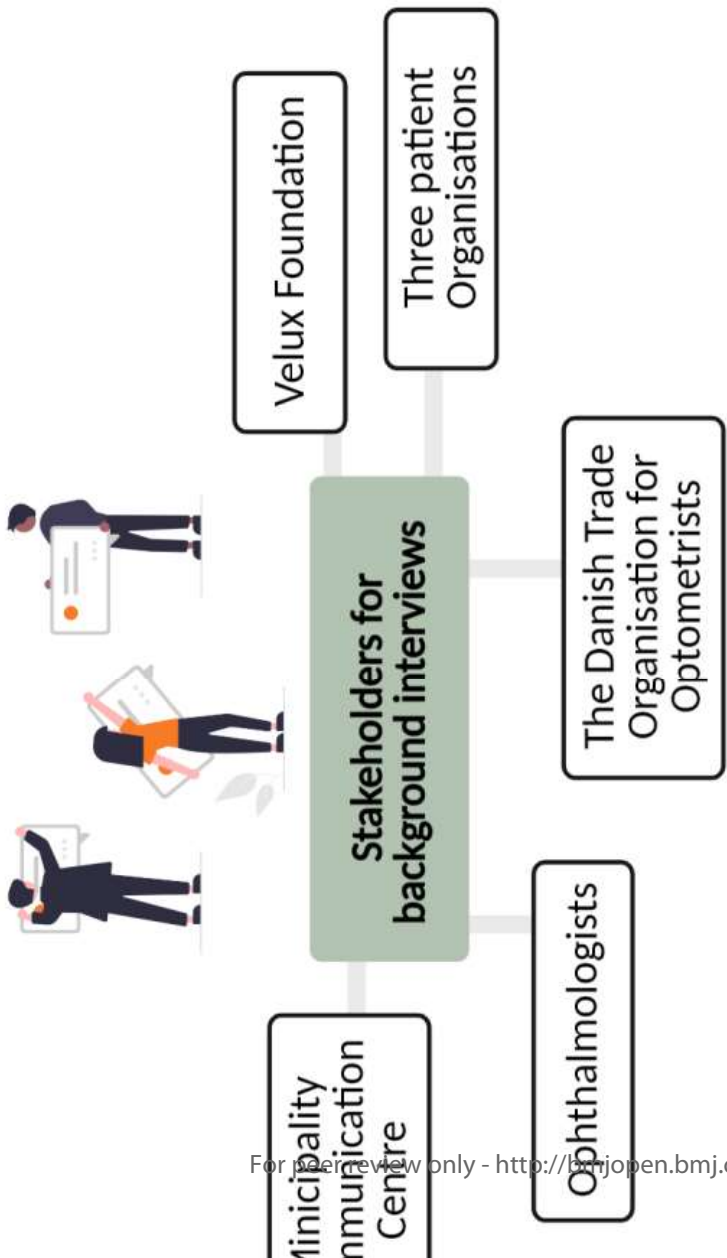

only

# BMJ Open

## DETECT – DEveloping and testing a model to identify preventive vision loss among older paTients in gEneral praCTice: Protocol for a complex intervention in Denmark

|                                 |                                                                                                                                                                                                                                                                                                                                                                                                                                                                                                                                                                                                                                                                                                                                                                                                                                                                                                                                                                                                                                                                                                                                                           |
|---------------------------------|-----------------------------------------------------------------------------------------------------------------------------------------------------------------------------------------------------------------------------------------------------------------------------------------------------------------------------------------------------------------------------------------------------------------------------------------------------------------------------------------------------------------------------------------------------------------------------------------------------------------------------------------------------------------------------------------------------------------------------------------------------------------------------------------------------------------------------------------------------------------------------------------------------------------------------------------------------------------------------------------------------------------------------------------------------------------------------------------------------------------------------------------------------------|
| Journal:                        | <i>BMJ Open</i>                                                                                                                                                                                                                                                                                                                                                                                                                                                                                                                                                                                                                                                                                                                                                                                                                                                                                                                                                                                                                                                                                                                                           |
| Manuscript ID                   | bmjopen-2022-069974.R1                                                                                                                                                                                                                                                                                                                                                                                                                                                                                                                                                                                                                                                                                                                                                                                                                                                                                                                                                                                                                                                                                                                                    |
| Article Type:                   | Protocol                                                                                                                                                                                                                                                                                                                                                                                                                                                                                                                                                                                                                                                                                                                                                                                                                                                                                                                                                                                                                                                                                                                                                  |
| Date Submitted by the Author:   | 28-Apr-2023                                                                                                                                                                                                                                                                                                                                                                                                                                                                                                                                                                                                                                                                                                                                                                                                                                                                                                                                                                                                                                                                                                                                               |
| Complete List of Authors:       | Sandholdt, Catharina; University of Copenhagen, Section of General Practice, Department of Public Health<br>Jønsson, Alexandra ; Roskilde University, Department of People and Technology; University of Copenhagen, Section of General Practice, Department of Public Health<br>Reventlow, Susanne; Copenhagen University Section of General Practice, Department of Public Health, Copenhagen University<br>Bach-Holm, Daniella; Rigshospitalet Glostrup, Department of Ophthalmology; University of Copenhagen, Department of Clinical Medicine<br>Line, Kessel; Rigshospitalet Glostrup, Department of Ophthalmology; University of Copenhagen, Department of Clinical Medicine<br>Kolko, Miriam; Rigshospitalet Glostrup, Department of Ophthalmology; University of Copenhagen, Department of Drug Design and Pharmacology<br>Jacobsen, Marie ; University of Copenhagen, Section of General Practice, Department of Public Health<br>Mathiesen, Olivia ; University of Copenhagen, Section of General Practice, Department of Public Health<br>Waldorff, Frans; University of Copenhagen, Section of General Practice, Department of Public Health |
| <b>Primary Subject Heading</b>: | General practice / Family practice                                                                                                                                                                                                                                                                                                                                                                                                                                                                                                                                                                                                                                                                                                                                                                                                                                                                                                                                                                                                                                                                                                                        |
| Secondary Subject Heading:      | Diagnostics, Health services research, Ophthalmology, Public health, Qualitative research                                                                                                                                                                                                                                                                                                                                                                                                                                                                                                                                                                                                                                                                                                                                                                                                                                                                                                                                                                                                                                                                 |
| Keywords:                       | Quality in health care < HEALTH SERVICES ADMINISTRATION & MANAGEMENT, OPHTHALMOLOGY, Glaucoma < OPHTHALMOLOGY, PRIMARY CARE, QUALITATIVE RESEARCH, PUBLIC HEALTH                                                                                                                                                                                                                                                                                                                                                                                                                                                                                                                                                                                                                                                                                                                                                                                                                                                                                                                                                                                          |
|                                 |                                                                                                                                                                                                                                                                                                                                                                                                                                                                                                                                                                                                                                                                                                                                                                                                                                                                                                                                                                                                                                                                                                                                                           |

SCHOLARONE™  
Manuscripts

1  
2  
3  
4  
5  
6  
7  
8  
9  
10  
11  
12  
13  
14  
15  
16  
17  
18  
19  
20  
21  
22  
23  
24  
25  
26  
27  
28  
29  
30  
31  
32  
33  
34  
35  
36  
37  
38  
39  
40  
41  
42  
43  
44  
45  
46  
47  
48  
49  
50  
51  
52  
53  
54  
55  
56  
57  
58  
59  
60

# DETECT – DEveloping and testing a model to identify preventive vision loss among older paTients in gEneral praCTice: Protocol for a complex intervention in Denmark

## Authors:

Catharina Thiel Sandholdt, casa@sund.ku.dk<sup>1</sup> \*

Alexandra Brandt Ryborg Jønsson, ajoensson@ruc.dk<sup>1,5</sup>

Susanne Reventlow, susrew@sund.ku.dk<sup>1</sup>

Daniella Bach-Holm, daniella.bach-holm.01@regionh.dk<sup>2,3</sup>

Line Kessel, line.kessel.01@regionh.dk<sup>2,3</sup>

Miriam Kolko, miriamk@sund.ku.dk<sup>2,4</sup>

Marie Honoré Jacobsen, mgr485@sund.ku.dk<sup>1</sup>

Olivia Hjulsager Mathiesen, olivia.hjulsager.mathiesen@sund.ku.dk<sup>1</sup>

Frans Boch Waldorff, fransw@sund.ku.dk<sup>1</sup>

## \*Corresponding author

<sup>1</sup>. Department of General Practice, Institute of Public Health, University of Copenhagen, Denmark

<sup>2</sup>. Department of Ophthalmology. Copenhagen University Hospital Rigshospitalet-Glostrup, Denmark

<sup>3</sup>. Department of Clinical Medicine, University of Copenhagen, Denmark

<sup>4</sup>. Department of Drug Design and Pharmacology, University of Copenhagen, Denmark

<sup>5</sup>. Department of People and Technology, Roskilde University, Denmark



## Abstract

Introduction: The number of people living with visual impairment is increasing. Visual impairment causes loss in quality of life and reduce self-care abilities. The burden of disease is heavy for people experiencing visual impairment and their relatives. The severity and progression of age-related eye-diseases are dependent on the time of detection and treatment options, making timely access to health-care critical in reducing visual impairment. General practice plays a key role in public health by managing preventive healthcare, diagnostics, and treatment of chronic conditions. General practitioners (GPs) coordinate services from other healthcare professionals. More involvement of the primary sector could potentially be valuable in detecting visual impairment.

Methods: We apply the Medical Research Council (MRC) framework for complex interventions to develop a primary care intervention with the GP as a key actor, aimed at identifying and coordinating care for patients with low vision. The development process will engage patients, relatives and relevant health-professional stakeholders. We will pilot-test the feasibility of the intervention in a real-world general practice setting. The intervention model will be developed through a participatory approach using qualitative and creative methods such as graphic facilitation. We aim to explore the potentials and limitations of general practice in relation to detection of preventable vision loss.

Ethics and dissemination: Ethics approval is obtained from local authority and the study meets the requirements from the Helsinki declaration. Dissemination is undertaken through research papers and to the broader public through podcasts and patient organizations.

## Strengths and limitations of this study

1. Visual impairment and vision loss are important health problems, but the role of general practice in relation to detection of visual impairment remains unclear. Through the Medical Research Council framework for complex interventions, this study seeks to unfold the potentials and limitations of the GP's role concerning visual impairment and vision loss
2. The study applies a participatory approach and explores the method of graphic facilitation to engage patients, relatives, GP's and other health professionals in the development of the intervention

3. The intervention will be tested in a real-world general practice setting in Denmark, which will ensure relevance and long-term acceptability of the intervention model
4. Limitations include that the intervention is in the pilot phase and will need to be tested in a larger scale at a later stage before wider implementation can be initiated

## Introduction

It is estimated that 2.2 billion people have impaired vision, and of these, at least 1 billion people have a vision loss that could have been prevented or reduced by earlier detection or by access to treatment (1). The most common causes of moderate to severe visual impairment are uncorrected refractive errors, un-operated cataract, age-related macular degeneration (AMD), glaucoma and diabetic retinopathy (2). Also in affluent welfare states such as Denmark – constituting the setting of this study – visual impairment is a problem.

The incidence of visual impairment increases with age, and due to the sociodemographic trajectory of an increasing elderly population, the prevalence of patients with visual impairment will increase (3). Timely access to health care has a major influence on the progression of eye conditions (1,2). The consequences of vision loss significantly affect the person's quality of life (4–6), dependence (7) and increases the risk of recurrent falls and fractures, which is a significant threat to mobility in old age (8–12). A YouGov poll showed that sight was by far the sensory function, people fear losing the most (13). Vision loss can result in worsened mental health (14,15), cognition (16,17) and social functioning (4). Disease progression can be complicated by other chronic conditions (18) and can complicate management of multimorbidity due to decreased self-care, ability to visit clinics and adherence to medication. Finally, vision loss can increase the risks of placement in nursing homes (19,20). Thus, visual impairment and loss has great impact on the individual, their relatives (21,22), society in general and on the healthcare system.

## General practice and visual impairment

GPs handle preventive healthcare, diagnostics, treatment and care of chronic conditions as well as coordinate services from various healthcare professionals (23). In the Global North, the GPs handle the majority of all medical matters. A survey set in English general practice from 1998 concluded that eye problems, including undiagnosed glaucoma and AMD, were quite frequent among elderly patients consulting their GP (24). One study found that patients were more likely to have their eyes checked if their GP suggests it (25). Additionally, an increased focus on eye health in at-risk

1  
2  
3 populations in general practice is suggested to be more effective for early detection than broader  
4 screening programs (26,27). However, a recent UK-based survey of GPs indicated that although up to  
5 five percent of the primary consultations were eye-related, GPs ability to identify red flags was low  
6 (28). The literature points to a gap where, even though patients are in contact with their GP  
7 concerning symptoms related to their vision, an unidentified number of patients may suffer from  
8 unrecognized visual impairment that is not detected in general practice.  
9  
10  
11  
12  
13

## 14 15 Collaboration across healthcare professions

16  
17 Since vision problems are rarely detected in general practice, the need for research into how  
18 patients and health professionals collaborate to identify and manage visual impairment becomes a  
19 relevant matter. This is in line with a recent Cochrane review, which concludes that future research  
20 should look at optimized primary care-based vision screening interventions (29). Patients with visual  
21 impairment often have contacts with many different healthcare professionals (30). It is therefore  
22 important to incorporate collaboration across health professions and sectors in a GP intervention  
23 aimed at improving identification of patients with visual impairment.  
24  
25

26 Optometrists constitute an occupational group who may be the first line of contact for some  
27 patients who experience visual changes. Optometrists will in most cases operate independently  
28 without a formal collaboration with other health professionals such as GPs (31). Given the  
29 optometrists contact with the patients and level of equipment for measuring vision and evaluating  
30 the eye, they pose a potentially important resource when collaboration across healthcare  
31 professions is rethought and are therefore important to include in the study. Their commercial  
32 agenda may influence their work and this will be evaluated in the collaboration (32,33).  
33  
34  
35  
36  
37  
38  
39  
40  
41  
42

## 43 Aim and objectives

44  
45 In this study, we aim to develop a health intervention in a Danish general practice setting to improve  
46 the detection and care of visual impairment. The patient target group is middle-aged and older  
47 adults and their relatives, with GP's constituting the primary professional target group. We define  
48 visual impairment broadly to be the patient experience of symptoms related to vision and findings  
49 identified by health professionals – such as reduced vision field – not yet experienced by the patient,  
50 but a serious threat to patient vision. Visual impairment is in this respect not connected to specific  
51 diagnoses, but as previously stated, we assume frequent eye-diseases such as glaucoma and AMD  
52 will be well represented.  
53  
54  
55  
56  
57

58 The overall aim of DETECT is thus to:  
59  
60

- 1
- 2
- 3 1. Develop an intervention in general practice aimed at identifying visual impairment among
- 4 elderly patients with chronic conditions.
- 5
- 6 2. Test the feasibility of the intervention model in general practice with a focus on ensuring
- 7 improved patient support and education.
- 8
- 9

## 10

## 11

## 12

## 13

## 14

## 15

## 16

## 17

## 18

## 19

## 20

## 21

## 22

## 23

## 24

## 25

## 26

## 27

## 28

## 29

## 30

## 31

## 32

## 33

## 34

## 35

## 36

## 37

## 38

## 39

## 40

## 41

## 42

## 43

## 44

## 45

## 46

## 47

## 48

## 49

## 50

## 51

## 52

## 53

## 54

## 55

## 56

## 57

## 58

## 59

## 60

### Methods and analysis

The study will be conducted in Denmark and is thus inscribed in a Scandinavian health system with universal access to health care. The general health status in Denmark is relatively high, and as far as vision is concerned, the incidence of legal blindness has decreased along with improved treatment options (34). The average life expectancy has increased over the last 70 years, which is positive, but it also entails a rise in age-related sight-threatening eye diseases such as glaucoma and AMD (35). Despite the decreasing incidence of legal blindness due to AMD, many patients are diagnosed late with irreversible vision loss. It seems relevant to diagnose eye diseases earlier and optimize the coordination of care. It is difficult to provide an exact number of people in Denmark who live with visual impairment. A national survey of health, quality of life and morbidity from 2007 shows that 3.8% of the population over 60 reported difficulties in reading a newspaper text (36), while the Danish Eye Association estimate that 50.000 people in Denmark above 60 years are blind or visually impaired (37) (total population 60+: 1.554.542 (38)).

In Denmark, the GP is the patient's primary entry point to the healthcare system, and the GP treats 90% of all medical cases (23). All Danes are assigned to a default general practice, and as many as 80% consult their GP at least annually, with an increased frequency among patients aged 50 or older. People with chronic conditions are offered an annual health check at their GP. A Danish survey from 2019 showed that 82.4% of men and 86.7% of women had their vision measured at their GP within the last three years (39). However, these figures are from 2010 to 2017. In 2017, regulations regarding driving licenses were changed, resulting in vision being measured only every 15 years. This may result in a lower frequency of vision acuity measurements at the GP today, but from the 2017 figures we can assume that the practice of performing vision measurements during the annual consultation for older adults is a well-known procedure.

Ophthalmologists can diagnose, treat and carry out the necessary checks of e.g., glaucoma and atrophic AMD in the primary sector. If indicated, patients are referred to secondary care in the hospitals' eye departments. Examples of referral indications may be neovascular AMD, proliferative diabetic retinopathy and medically uncontrollable glaucoma. At the hospitals, ophthalmologists

1  
2  
3 work publicly funded and university hospital clinics have an obligation to do research within the  
4 field.  
5

6  
7 Consultations with the GP or ophthalmologist are tax financed and without an out-of-pocket fee to  
8 patients (40,41). Hospital-based eye clinics are also free of charge, but the patient must be referred  
9 by a primary sector ophthalmologist for treatment. In cases of acute vision loss or pain, patients can  
10 be seen directly in the emergency room and referred from there to the on-call ophthalmologist in  
11 the hospital eye department. Anyone can book an appointment with the ophthalmologist in the  
12 primary sector without a referral, but due to a low number of ophthalmologists compared to the  
13 increasing demand, it is often difficult to book a consultation within a reasonable time frame and  
14 geographical distance. On the other hand, the GP must be available to all patients inscribed in  
15 his/her practice, and have an in-depth knowledge of the patient's general health and condition. The  
16 GPs therefore seem to be in an ideal situation to identify visual impairment and coordinate the  
17 management.  
18

19  
20 It's estimated that around 2000 optometrists operate in Denmark (total population 5.8mill.) and  
21 opticians shops can be found in most smaller cities, making it accessible even in rural areas to visit  
22 an optician shop (42,43). In most optician shops, it is free of charge to have vision tested. Many  
23 optometrists offer intraocular pressure measurements and fundus photographs as additional  
24 procedures for a fee. Optometrists are thus a professional stakeholder that we find interesting to  
25 explore further.  
26

## 27 28 29 30 31 32 33 34 35 36 37 38 39 Study phases

40  
41 We apply the Medical Research Council (MRC) guidance on developing, testing and evaluating  
42 complex interventions (44,45). To operationalize the framework for complex interventions, we  
43 apply a temporal structure from the tradition of human-centered design to divide the project cycle  
44 into three main phases: (I) identify the problem, (II) develop the model and (III) test the feasibility of  
45 the model.(46) Phase I+II focus on intervention development applying qualitative methods and  
46 Phase III aims to first pilot-test the intervention for feasibility and following implement it broader in  
47 a cohort study to measure effect.  
48

49  
50 The intervention explores what patients, carers and professionals perceive as pivotal to improve  
51 regarding detection, navigating care and health services and support possibilities for people living  
52 with visual impairment. We are explicitly reflective on, how process and product are interwoven and  
53 to a very high extent dependent on the context it unfolds within (44,47). Following a structured and  
54 well-documented design process we identify the changes made and insights produced (see Figure 1).  
55  
56  
57  
58  
59  
60

1  
2  
3  
4  
5  
6  
7 [INSERT Figure 1<sup>1</sup>. *Figure 1: DETECT overall study design and participants engaged.*]  
8  
9

## 10 **Phase I: Identify** –Identifying key issues to address in the health intervention

11  
12 The aim of Phase I is to explore the problem we are addressing. We will perform a literature search  
13 on detection of eye-diseases in general practice and conduct background interviews with a broad  
14 selection of relevant stakeholders to help us map the current practice in detecting and diagnosing  
15 eye conditions across sectors in the health care system (see Figure 2).  
16  
17  
18  
19  
20  
21

22 [INSERT figure 2. *Figure 2: Stakeholders identified to participate in a background interview*]  
23  
24  
25

26 An essential element in human-centered design processes is to create understanding and empathy  
27 for the end-user (48,49) – in our case people living with visual impairment and their relatives. We  
28 aim to incorporate a wide spectrum of eye-diagnoses and develop a model to identify and diagnose  
29 visual impairment that works from the onset of the patient's early symptoms, such as stumbling  
30 over doorsteps, difficulties in reading, distorted vision or difficulties related to the transition from  
31 dark to light spaces and vice versa. The intervention aim of increased patient support also includes  
32 support of relatives, who carries a large part of the burden of the disease and may experience stress  
33 and depression due to their loved one's visual impairment (50).  
34  
35  
36  
37  
38  
39  
40  
41

### 42 *Patient and public involvement in Phase I*

43  
44 Patients, relatives and professionals will be involved by providing their perspectives in various stages  
45 of the study and co-design core elements of the model constituting the intervention. The patient  
46 engagement process is informed by a thorough report produced by the Danish Center for Social  
47 Science Research on older adults with visual impairment and vision loss (35). The report underlines  
48 the need for increased knowledge on how visual impairment affects patients' every-day life in all  
49 aspects. The experiences, needs, preferences, and values of patients and relatives will thus be  
50 explored (51). See Figure 1 for an overview of the involvement of participants across the three project  
51 phases.  
52  
53  
54  
55  
56  
57  
58  
59  
60

---

<sup>1</sup> Figure 1+2 were created with BioRender.com

1  
2  
3  
4  
5 In Phase I, we perform semi-structured interviews with patients and relatives, preferably in their  
6 homes to gain an insight in their experiences in the context in which they occur. Here we focus on  
7 the patient journey from the time patients experience symptoms leading to a diagnosis and handling  
8 life afterwards with a diagnosis. After the interview, patients and relatives are encouraged to contact  
9 the researcher if they would like her/him to participate in e.g., a visit to the ophthalmologist or if  
10 they have further input or concerns at a later stage.

11  
12  
13  
14  
15 We will furthermore perform focus-group interviews with older adults to investigate (1) the  
16 expectations to vision in old age and (2) which health professionals' older adults identify as relevant  
17 when they experience vision changes. The focus-group interviews supplement the interviews with  
18 patient and relative with a view to gaining insight into the social norms and prominent attitudes  
19 towards visual impairment among older adults. The participants in the focus-group interviews are  
20 asked to complete the validated Visual Function Questionnaire-25 to provide more individual  
21 knowledge about the participants own perception of their vision function (52).

22  
23  
24  
25  
26 Through participant observations, we will generate knowledge on the everyday working  
27 environment and challenges that health professionals, private optometrists and communal workers  
28 navigate in concerning people with visual impairment (53).

## 31 32 33 34 **Phase II: Develop – Developing the intervention-model**

35  
36 In Phase II, we operationalize the insights from Phase I. This will be done through three consecutive  
37 content-developing workshops using the creative method of graphic facilitation (54).

38  
39 Graphic facilitation is well suited when elaborating on ideas and problem-solving processes because  
40 it allows for a transparent process open to multiple agendas. The method can be relevant for  
41 redistributing power and expertise in a co-design activity and the physical product of the three  
42 content workshops will act as design principles for the intervention. (55,56). CTS facilitates the  
43 workshops and we invite a graphic facilitator to analogue draw and write inputs from the  
44 participants on a wall-to-wall paper during the workshops. The graphic recordings from the three  
45 workshops constitute a collective overview of core elements to include in the intervention-model  
46 (see description below and figure 1 for specifics on the workshop content). Choosing a visual method  
47 to engage participants could seem an unusual choice in a project focusing on visual impairment and  
48 vision loss. However, the participants are not blind. They live with a visual impairment, which poses  
49 a range of consequences and constraints in their every-day life, but it does not prevent them from  
50 being able to participate in a graphic facilitated workshop. If needed, relevant aids will be provided –  
51 in example to enlarge the graphic recordings on a tablet

1  
2  
3  
4  
5 Flow of the three workshops: The graphic facilitator and project researchers develop a template for  
6 the workshops. Participants for the workshops are recruited among participants in phase I.

7  
8 **Workshop 1:**

9  
10 In this workshop, the graphic facilitator engages patients and relatives to formulate a graphic  
11 recording on what is lacking in the identification, diagnosis and patient support concerning visual  
12 impairment.

13  
14  
15 **Workshop 2:**

16 The focus for this workshop is to include perspectives from relevant health professionals in the  
17 design phase. The health professionals are asked to identify possibilities and barriers of an  
18 intervention concerning vision impairment in general practice, including a discussion on key eye  
19 examinations and measures that would be feasible in a general practice setting as well as to identify  
20 the most relevant prevalent progressive severe eye diseases.

21  
22  
23  
24  
25 **Workshop 3:**

26 Aims to synthesize the knowledge produced in the previous two workshops by formulating the  
27 specific activities, concrete consultation type and identify final intervention effect measurements.  
28 This also includes choosing the relevant guidelines for screening and diagnosing to apply in the  
29 intervention. Participants are GP's and project researchers. Other stakeholders will be invited if  
30 relevant based on the insights from workshop 1+2.  
31  
32  
33  
34  
35  
36  
37  
38

39 **Phase III: Feasibility– Feasibility test in general practice**

40  
41 **Part 1: Pilot-test**

42 The intervention model will be first be validated and adjusted accordingly by patient representatives  
43 and ophthalmologists. The model will then be tested in a general practice setting to establish face  
44 validity and adjust according to the experiences. The model must be clinically relevant and feasible  
45 for implementation in a clinical practice. Data production continues in this phase through  
46 observational studies and interviews with GPs to disseminate the experiences with the model in  
47 general practice and whether the model can be part of improved collaboration between health  
48 professionals.  
49

50  
51  
52  
53  
54 **Part 2: Cohort study**

55 Based on findings from the pilot-test, we expand the intervention by including ten to fifteen GP  
56 practices in the Capital and Zealand Region, Denmark to participate in testing the GP's possibilities  
57 and barriers to detect visual impairment and vision loss. According to previous literature (36), we  
58  
59  
60



1  
2  
3 need to include 1500-2000 patients in general practice aged 65 or older to identify 150-200 with  
4 visual impairment. The practices will receive the developed intervention-model and recruit in up to  
5 18 months. Patients 65+ who consult their GP as part of an annual consultation for a chronic  
6 condition will be informed about the study in the waiting room and asked to complete a  
7 questionnaire based on the validated Visual functioning Questionnaire 25 (52). The questionnaire  
8 measures the dimensions of self-reported vision-targeted health status that are most important to  
9 individuals who have chronic eye diseases. A dedicated staff or GP will examine the vision according  
10 to the guidelines formulated in the model. If visual impairment is detected, the patient will undergo  
11 further examinations assessed by an ophthalmologist.

12  
13 The specifics of the examinations in general practice and at an ophthalmologist cannot be reported  
14 until the phases I+II have been completed, since these are to be developed in the co-design process.  
15 At present we assume an ordinary vision test, visual fields and contrast vision as well as a function  
16 test could be included in the GP setting. We assume that measurement of the visual acuity,  
17 tonometry, macular- and parapapillary OCT-scans and fundus photographs could be part of the  
18 extended examinations at an ophthalmologist. An important outcome of Phase II is thus detailed  
19 information on effect measurements, chosen guidelines and possibly a narrowed focus on specific  
20 eye-diseases to address in the intervention. The results from the cohort-study will function as a  
21 reference standard and allow us to study the prevalence of visual impairments as well as eye  
22 diseases and study predictor's for visual impairment as well. Due to the Danish registers, it is  
23 possible to follow the cohort for a long period (57). This follow-up study is not part of the present  
24 project, but will be planned later.

## 40 Analysis

41  
42 The analytical process will be carried out iteratively, which covers analytical steps taken between  
43 each of the three project phases to ensure appropriate adjustments in the design of the intervention  
44 model (58).

45 All formal interviews from the study will be audio-recorded and transcribed following a project  
46 guideline to ensure uniformity. The three phases will generate observations and informal talks,  
47 which will be documented through field-notes and pictures. Details on the analytical steps are  
48 illustrated in figure 3.

49 [INSERT FIGURE 3. *Figure 3: Analytical steps*]

## Ethics and dissemination

Ethical issues will be a consideration at all levels of the study both when involving patients in the participatory design and during the cohort-study. The study is registered in the records of research projects containing personal data at University of Copenhagen (J.nr: 514-0701/22-3000). It will be conducted according to the ethical standards of the Helsinki Declaration and GDPR-legislation.

Ethical approval was waived by the Danish National Ethical Research Committee because no bio-material is included in the study.

In data production, all participants will be asked to read and sign a consent form regarding their specific participation and kind of information, including how we will handle the information provided to us as, well as information on how to withdraw consent at a later stage. In the qualitative data production, we will produce photographic and graphic material, which requires further ethical reflections in terms of anonymization.

The cohort study involves a risk of over-diagnostic practice due to the tests and screening involved (59). Any potential harms, over-diagnosis, labelling effect and consequences of receiving the intervention will be scrutinized during the study (60). Age-related visual impairment diagnoses including glaucoma and AMD meet the requirements for screening formulated by WHO (61).

During the analysis, both benefits and harms of the intervention will be investigated and presented as results. Results will be published in peer-reviewed journals, preferably open-access. Patients, relatives and health professionals are invited in as co-authors where relevant. We will present our results in relevant fora nationally and internationally (conferences, annual meetings, etc.).

Additionally, we will organize a symposium directed at stakeholders from health and social care sector and employers. The participants from the three content-developing workshops in Phase II will be invited to participate in the symposia and share their experiences of being part of the research process. For communication to lay persons, we will produce a podcast on sensory loss in old age focused on vision and participate in the yearly Danish democracy and community festival "*Folkemødet*", which has a specific focus on communicating public health science.

The proposed study is relevant for ensuring kind and empathic care (62,63) with time to guide and comfort patients (64). This requires knowledge about how the patient experiences visual impairment as well as identification of the current challenges in the health services provided, which we aim to improve following the DETECT intervention. Specifically relevant in this study is the focus on general practice in relation to visual impairment, which is currently an understudied area.

## Implications

Collectively, the output of intervention will help us understand, how to support and treat patients with impaired vision and to define an expedient role for general practice. In this respect, adding knowledge on the GP perspective will strengthen the feasibility of the intervention. The development of a co-designed intervention can have an important impact on the delivered quality in the diagnosis and management of patients with visual impairment in primary care.

## Authors Contributions

FBW, ABRJ, SR & CTS developed the original idea for the study. CTS wrote first draft of the protocol. CTS, ABRJ, SR, FBW, MHJ & OHM were primary in developing the methodological framework for the study. DBH, LK & MK provided detailed information regarding clinical procedures and ophthalmological expertise. MHJ & FBW performed the initial literature search. All authors critically reviewed and revised the initial draft and approved the final version of the manuscript.

## Acknowledgments

The authors wish to thank Ann-Kathrin Lindahl Christiansen for making Figure 1+2. We also wish to thank Professor Morten Dornoville de la Cour for contributing in discussions on clinical relevance and design of the cohort study.

## Conflicts of interest

None to declare

## Funding

This work was supported by The Velux Foundation, grant number: 869353

## References

1. World Health Organization. World report on vision. 2019;

2. Steinmetz JD, Bourne RR, Briant PS, Flaxman SR, Taylor HR, Jonas JB, et al. Causes of blindness and vision impairment in 2020 and trends over 30 years, and prevalence of avoidable blindness in relation to VISION 2020: the Right to Sight: an analysis for the Global Burden of Disease Study. *The Lancet Global Health*. 2021;9(2):e144–60.
3. Brown GC, Brown MM, Sharma S, Stein JD, Roth Z, Campanella J, et al. The burden of age-related macular degeneration: a value-based medicine analysis. *Trans Am Ophthalmol Soc*. 2005;103:14.
4. Hajek A, Brettschneider C, Lühmann D, Eisele M, Mamone S, Wiese B, et al. Does visual impairment affect social ties in late life? Findings of a multicenter prospective cohort study in Germany. *The journal of nutrition, health & aging*. 2017;21(6):692–8.
5. Lamoureux E, Pesudovs K. Vision-specific quality-of-life research: a need to improve the quality. *American journal of ophthalmology*. 2011;151(2):195–7.
6. Langelaan M, De Boer MR, Van Nispen RM, Wouters B, Moll AC, Van Rens GH. Impact of visual impairment on quality of life: a comparison with quality of life in the general population and with other chronic conditions. *Ophthalmic epidemiology*. 2007;14(3):119–26.
7. Brown JC, Goldstein JE, Chan TL, Massof R, Ramulu P, Low Vision Research Network Study Group. Characterizing functional complaints in patients seeking outpatient low-vision services in the United States. *Ophthalmology*. 2014;121(8):1655–62.
8. Swenor BK, Munoz B, West SK. Does visual impairment affect mobility over time? The Salisbury Eye Evaluation Study. *Investigative ophthalmology & visual science*. 2013;54(12):7683–90.
9. de Boer MR, Pluijm SM, Lips P, Moll AC, Völker-Dieben HJ, Deeg DJ, et al. Different aspects of visual impairment as risk factors for falls and fractures in older men and women. *Journal of bone and Mineral Research*. 2004;19(9):1539–47.
10. Lord SR. Visual risk factors for falls in older people. *Age and ageing*. 2006;35(suppl\_2):ii42–5.
11. Crews JE, Chou CF, Stevens JA, Saaddine JB. Falls among persons aged  $\geq 65$  years with and without severe vision impairment—United States, 2014. *Morbidity and Mortality Weekly Report*. 2016;65(17):433–7.
12. Tseng VL, Yu F, Lum F, Coleman AL. Risk of fractures following cataract surgery in Medicare beneficiaries. *Jama*. 2012;308(5):493–501.
13. Hoang Nguyen. Of the five senses, a majority would miss sight the most [Internet]. YouGovAmerica. 2018 [cited 2022 Oct 3]. Available from: <https://today.yougov.com/topics/health/articles-reports/2018/07/25/five-senses-majority-would-miss-sight-most>
14. Kempen GI, Ballemans J, Ranchor AV, van Rens GH, Zijlstra G. The impact of low vision on activities of daily living, symptoms of depression, feelings of anxiety and social support in community-living older adults seeking vision rehabilitation services. *Quality of life research*. 2012;21(8):1405–11.

15. Rees G, Tee HW, Marella M, Fenwick E, Dirani M, Lamoureux EL. Vision-specific distress and depressive symptoms in people with vision impairment. *Investigative ophthalmology & visual science*. 2010;51(6):2891–6.
16. Lin M, Gutierrez P, Stone K, Yaffe K, Ensrud K, Fink H, et al. Vision impairment and combined vision and hearing impairment predict cognitive and functional decline among older women. *JOURNAL OF GENERAL INTERNAL MEDICINE*. 2002;17:179–179.
17. Reyes-Ortiz CA, Kuo Y, DiNuzzo AR, Ray LA, Raji MA, Markides KS. Near vision impairment predicts cognitive decline: data from the Hispanic Established Populations for Epidemiologic Studies of the Elderly. *Journal of the American Geriatrics Society*. 2005;53(4):681–6.
18. Anderson G, Horvath J. The growing burden of chronic disease in America. *Public health reports*. 2004;119(3):263–70.
19. Hajek A, Brettschneider C, Lange C, Posselt T, Wiese B, Steinmann S, et al. Longitudinal predictors of institutionalization in old age. *PloS one*. 2015;10(12):e0144203.
20. Wang JJ, Mitchell P, Cumming RG, Smith W. Visual impairment and nursing home placement in older Australians: the Blue Mountains Eye Study. *Ophthalmic epidemiology*. 2003;10(1):3–13.
21. Hanemoto T, Hikichi Y, Kikuchi N, Kozawa T. The impact of different anti-vascular endothelial growth factor treatment regimens on reducing burden for caregivers and patients with wet age-related macular degeneration in a single-center real-world Japanese setting. *PloS one*. 2017;12(12):e0189035.
22. Spooner KL, Mhlanga CT, Hong TH, Broadhead GK, Chang AA. The burden of neovascular age-related macular degeneration: a patient's perspective. *Clinical Ophthalmology (Auckland, NZ)*. 2018;12:2483.
23. Pedersen KM, Andersen JS, Søndergaard J. General practice and primary health care in Denmark. *The Journal of the American Board of Family Medicine*. 2012;25(Suppl 1):S34–8.
24. Reidy A, Minassian D, Vafidis G, Joseph J, Farrow S, Wu J, et al. Prevalence of serious eye disease and visual impairment in a north London population: population based, cross sectional study. *Bmj*. 1998;316(7145):1643–6.
25. Ammary-Risch NJ, Huang S. The primary care physician's role in preventing vision loss and blindness in patients with diabetes. *Journal of the National Medical Association*. 2011;103(3):281–3.
26. Rowe S, MacLean CH, Shekelle PG. Preventing visual loss from chronic eye disease in primary care: scientific review. *Jama*. 2004;291(12):1487–95.
27. Stein JD, Khawaja AP, Weizer JS. Glaucoma in adults—Screening, diagnosis, and management: A review. *Jama*. 2021;325(2):164–74.

28. Kilduff C, Lois C. Red eyes and red-flags: improving ophthalmic assessment and referral in primary care. *BMJ Open Quality*. 2016;5(1):u211608-w4680.
29. Clarke EL, Evans JR, Smeeth L. Community screening for visual impairment in older people. *Cochrane database of systematic reviews*. 2018;(2).
30. Harper RA, Gunn PJ, Spry PG, Fenerty CH, Lawrenson JG. Care pathways for glaucoma detection and monitoring in the UK. *Eye*. 2020;34(1):89–102.
31. Loughman J, Nolan J, Stack J, Beatty S. Online AMD research study for optometrists: current practice in the Republic of Ireland and UK. *Optometry in Practice*. 2011;12(4):135–44.
32. Townsend D, Reeves B, Taylor J, Chakravarthy U, O'Reilly D, Hogg R, et al. Health professionals' and service users' perspectives of shared care for monitoring wet age-related macular degeneration: a qualitative study alongside the ECHoES trial. *BMJ open*. 2015;5(4):e007400.
33. Shickle D, Griffin M. Why don't older adults in England go to have their eyes examined? *Ophthalmic and Physiological Optics*. 2014;34(1):38–45.
34. Høeg TB, Ellervik C, Buch H, La Cour M, Klemp K, Kvetny J, et al. Danish Rural Eye Study: epidemiology of adult visual impairment. *Ophthalmic Epidemiology*. 2016;23(1):53–62.
35. Anna Amilon, Maria Lomborg Røgeskov, Juliane Birkedal Poulsen, Anu Siren, Rikke Nøhr Brønner. Ældre med Synstab (older adults with vision loss) [Internet]. VIVE, The Danish Center for Social Research; 2021 [cited 2022 Apr 27]. Available from: <https://www.vive.dk/da/udgivelser/aeldre-med-synstab-15830/>
36. Ekholm O, Kjølner M, Davidsen M, Hesse U, Eriksen L, Christensen AI, et al. Sundhed og sygelighed i Danmark & udviklingen siden 1987. 2007;
37. Øjenforeningen (The Danish Eye Association magazine) [Internet]. [cited 2022 Nov 3]. Available from: <https://ojenforeningen.dk/>
38. Danmarks Statistik (Danish Statistics). Statistikbanken [Internet]. [cited 2022 Jun 29]. Available from: <https://www.statistikbanken.dk/FOLK1AM>
39. Sundhedsstyrelsen. Ældres Sundhed OG Trivsel. Sundhedsstyrelsen. 2019;6–108.
40. Krasnik A, Vallgård S, Christiansen T, Høyer KL. Sundhedsvæsen og sundhedspolitik. Munksgaard Danmark; 2010.
41. Wadmann S, Strandberg-Larsen M, Vrangbæk K. Coordination between primary and secondary healthcare in Denmark and Sweden. *International journal of integrated care*. 2009;9.
42. The Danish Trade Organisation for Opticians. Om Optikerforeningen (about the Danish Trade Organisation for Opticians) [Internet]. [cited 2022 Jun 29]. Available from: <https://www.optikerforeningen.dk/om-optikerforeningen/>

- 1
- 2
- 3
- 4 43. Da optikerne blev til optometrister | Øjenforeningen (When opticians became
- 5 optometrists | Eye Association) [Internet]. [cited 2022 Nov 3]. Available from:
- 6 <https://ojenforeningen.dk/artikler/optikerne-blev-til-optometrister>
- 7
- 8 44. Skivington K, Matthews L, Simpson SA, Craig P, Baird J, Blazeby JM, et al. A new
- 9 framework for developing and evaluating complex interventions: update of Medical
- 10 Research Council guidance. *bmj*. 2021;374.
- 11
- 12 45. Lemire S, Kwako A, Nielsen SB, Christie CA, Donaldson SI, Leeuw FL. What is this
- 13 thing called a mechanism? Findings from a review of realist evaluations. *New Directions*
- 14 *for Evaluation*. 2020;2020(167):73–86.
- 15
- 16 46. Sandholdt CT, Cunningham J, Westendorp RG, Kristiansen M. Towards inclusive
- 17 healthcare delivery: potentials and challenges of human-centred design in health
- 18 innovation processes to increase healthy aging. *International Journal of Environmental*
- 19 *Research and Public Health*. 2020;17(12):4551.
- 20
- 21
- 22 47. Craig P, Di Ruggiero E, Frolich KL, Mykhalovskiy E, White M, Campbell R, et al.
- 23 Taking account of context in population health intervention research: guidance for
- 24 producers, users and funders of research. 2018;
- 25
- 26 48. Bovaird T, Loeffler E. The role of co-production for better health and wellbeing: why we
- 27 need to change. E Loeffler, G Power, T Bovaird, and F Hine-Hughes, editors *Co-*
- 28 *production of health and wellbeing in Scotland Governance International*, Birmingham,
- 29 UK. 2013;20–8.
- 30
- 31
- 32 49. Witteman HO, Dansokho SC, Colquhoun H, Coulter A, Dugas M, Fagerlin A, et al. User-
- 33 centered design and the development of patient decision aids: protocol for a systematic
- 34 review. *Systematic reviews*. 2015;4(1):11.
- 35
- 36 50. Amilon A, Siren A. The link between vision impairment and depressive symptomatology
- 37 in late life: does having a partner matter? *European Journal of Ageing*. 2021;1–12.
- 38
- 39 51. Bate P, Robert G. Experience-based design: from redesigning the system around the
- 40 patient to co-designing services with the patient. *BMJ Quality & Safety*. 2006;15(5):307–
- 41 10.
- 42
- 43
- 44 52. Sørensen MS, Andersen S, Henningsen GO, Larsen CT, Sørensen TL. Danish version of
- 45 Visual Function Questionnaire-25 and its use in age-related macular degeneration. *Dan*
- 46 *Med Bull*. 2011;58(6):A4290.
- 47
- 48 53. Spradley JP. *Participant Observation*. USA: Waveland Press; 2016. 207 p.
- 49
- 50 54. Sandholdt CT, Srivarathan A, Kristiansen M, Malling GMH, Olesen KVM, Jeppesen M,
- 51 et al. Undertaking graphic facilitation to enable participation in health promotion
- 52 interventions in disadvantaged neighbourhoods in Denmark. *Health Promotion*
- 53 *International*. 2022;37(Supplement\_2):ii48–ii47.
- 54
- 55 55. Espiner D, Hartnett F. Innovation and graphic facilitation. *Aotearoa New Zealand Social*
- 56 *Work*. 2016;28(4):44–53.
- 57
- 58
- 59
- 60

- 1
  - 2
  - 3
  - 4
  - 5
  - 6
  - 7
  - 8
  - 9
  - 10
  - 11
  - 12
  - 13
  - 14
  - 15
  - 16
  - 17
  - 18
  - 19
  - 20
  - 21
  - 22
  - 23
  - 24
  - 25
  - 26
  - 27
  - 28
  - 29
  - 30
  - 31
  - 32
  - 33
  - 34
  - 35
  - 36
  - 37
  - 38
  - 39
  - 40
  - 41
  - 42
  - 43
  - 44
  - 45
  - 46
  - 47
  - 48
  - 49
  - 50
  - 51
  - 52
  - 53
  - 54
  - 55
  - 56
  - 57
  - 58
  - 59
  - 60
56. Hautopp H, Ørngreen R. A review of graphic facilitation in organizational and educational contexts. *Designs for Learning*. 2018;10(1):53–62.
57. Schmidt M, Schmidt SAJ, Adelborg K, Sundbøll J, Laugesen K, Ehrenstein V, et al. The Danish health care system and epidemiological research: from health care contacts to database records. *Clinical epidemiology*. 2019;563–91.
58. Papoutsis C, Wherton J, Shaw S, Morrison C, Greenhalgh T. Putting the social back into sociotechnical: Case studies of co-design in digital health. *Journal of the American Medical Informatics Association*. 2021;28(2):284–93.
59. Brodersen J, Jorgensen KJ, Gotzsche PC. The benefits and harms of screening for cancer with a focus on breast screening. *Pol Arch Med Wewn*. 2010;120(3):89–94.
60. Bonell C, Jamal F, Melendez-Torres G, Cummins S. ‘Dark logic’: theorising the harmful consequences of public health interventions. *J Epidemiol Community Health*. 2015;69(1):95–8.
61. World Health Organization. Screening programmes: a short guide. Increase effectiveness, maximize benefits and minimize harm. 2020;
62. Kristiansen M. The difference that kind and compassionate care makes. *BMJ (online)*. 2018;
63. Montori VM. Turning away from industrial health care toward careful and kind care. *Academic Medicine*. 2019;94(6):768–70.
64. Pieterse AH, Stiggelbout AM, Montori VM. Shared decision making and the importance of time. *Jama*. 2019;322(1):25–6.



**Phase I Identify**

**Background interviews**  
with relevant stakeholders\*

**Recruitment of participants**  
Maximum variation in urban versus rural geography, gender, and patient + relatives socioeconomic background\*\*

Professional network    Social media posts    Snowball method

**Interviews with patients with vision impairment**  
All genders. +55 years of age

**Interviews with relatives**  
All genders. +18 years of age

7-10 patients  
3-6 relatives

**Participant observations**  
Professional participants  
All genders. +18 years of age

3-4 GP  
2-3 ophthalmologists  
1-2 eye-clinic hospital ophthalmologist  
3-4 optometrists

**Focus-group interviews**  
All genders. +55 years of age

16-24 older adults

**Phase II Develop**

**Voluntary participant follow-up**  
Initiated by patients and relatives from phase I, when relevant

**Three consecutive content developing workshops**  
Applying graphic facilitation. Participants are recruited from Phase I

**Workshop 1**  
2-4 patients  
2-3 relatives

**Workshop 2**  
1-2 GP  
1-2 ophthalmologists  
1-2 eye-clinic hospital ophthalmologist  
1-2 optometrists

**Workshop 3**  
1-2 GP  
DETECT Project group

content

**Phase III Feasibility**

**PART I: Feasibility study**

2-3 GP practices

**Feasibility test in general practice**  
Observational studies and interviews with GPs and GP clinical personnel

DETECT Intervention model

**PART II: Pilot-test**

1,500-2,000 patients, visiting their GP (10-15 GP practices)

**Pilot-test and cohort study**  
Patient questionnaire and a consultation including vision examination  
All genders. +65 of age

\* See figure 2  
\*\* Must be able to understand and communicate sufficiently in Danish or English and be able to provide written or oral consent

1  
2  
3  
4  
5  
6  
7  
8  
9  
10  
11  
12  
13  
14  
15  
16  
17  
18  
19  
20  
21  
22  
23  
24  
25  
26  
27  
28  
29  
30  
31  
32  
33  
34  
35  
36  
37  
38  
39  
40  
41  
42  
43  
44  
45  
46  
47  
48  
49  
50  
51  
52  
53  
54  
55  
56  
57  
58  
59  
60

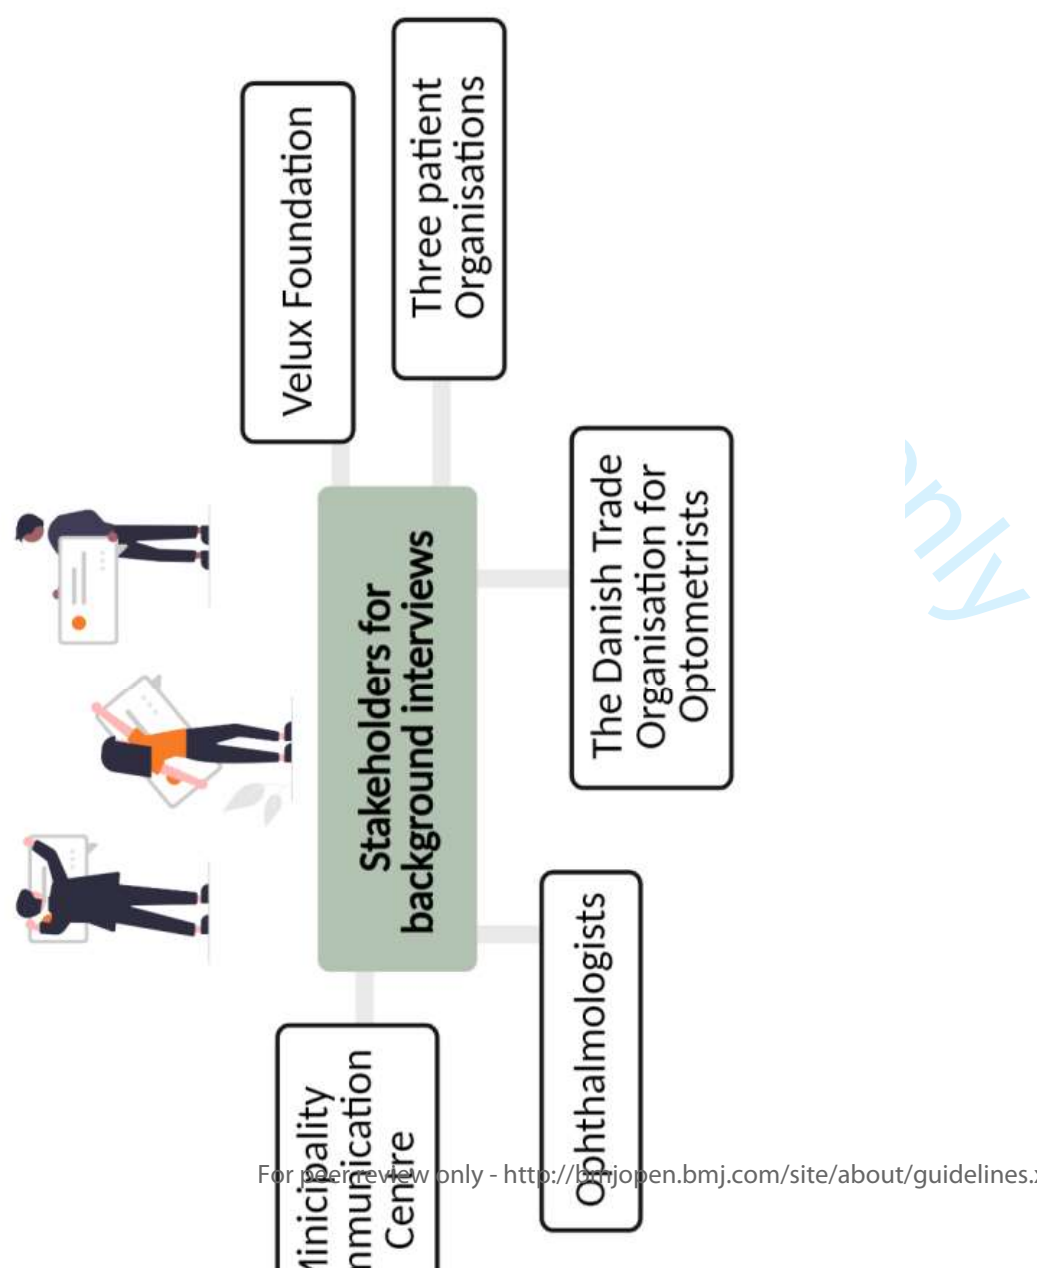

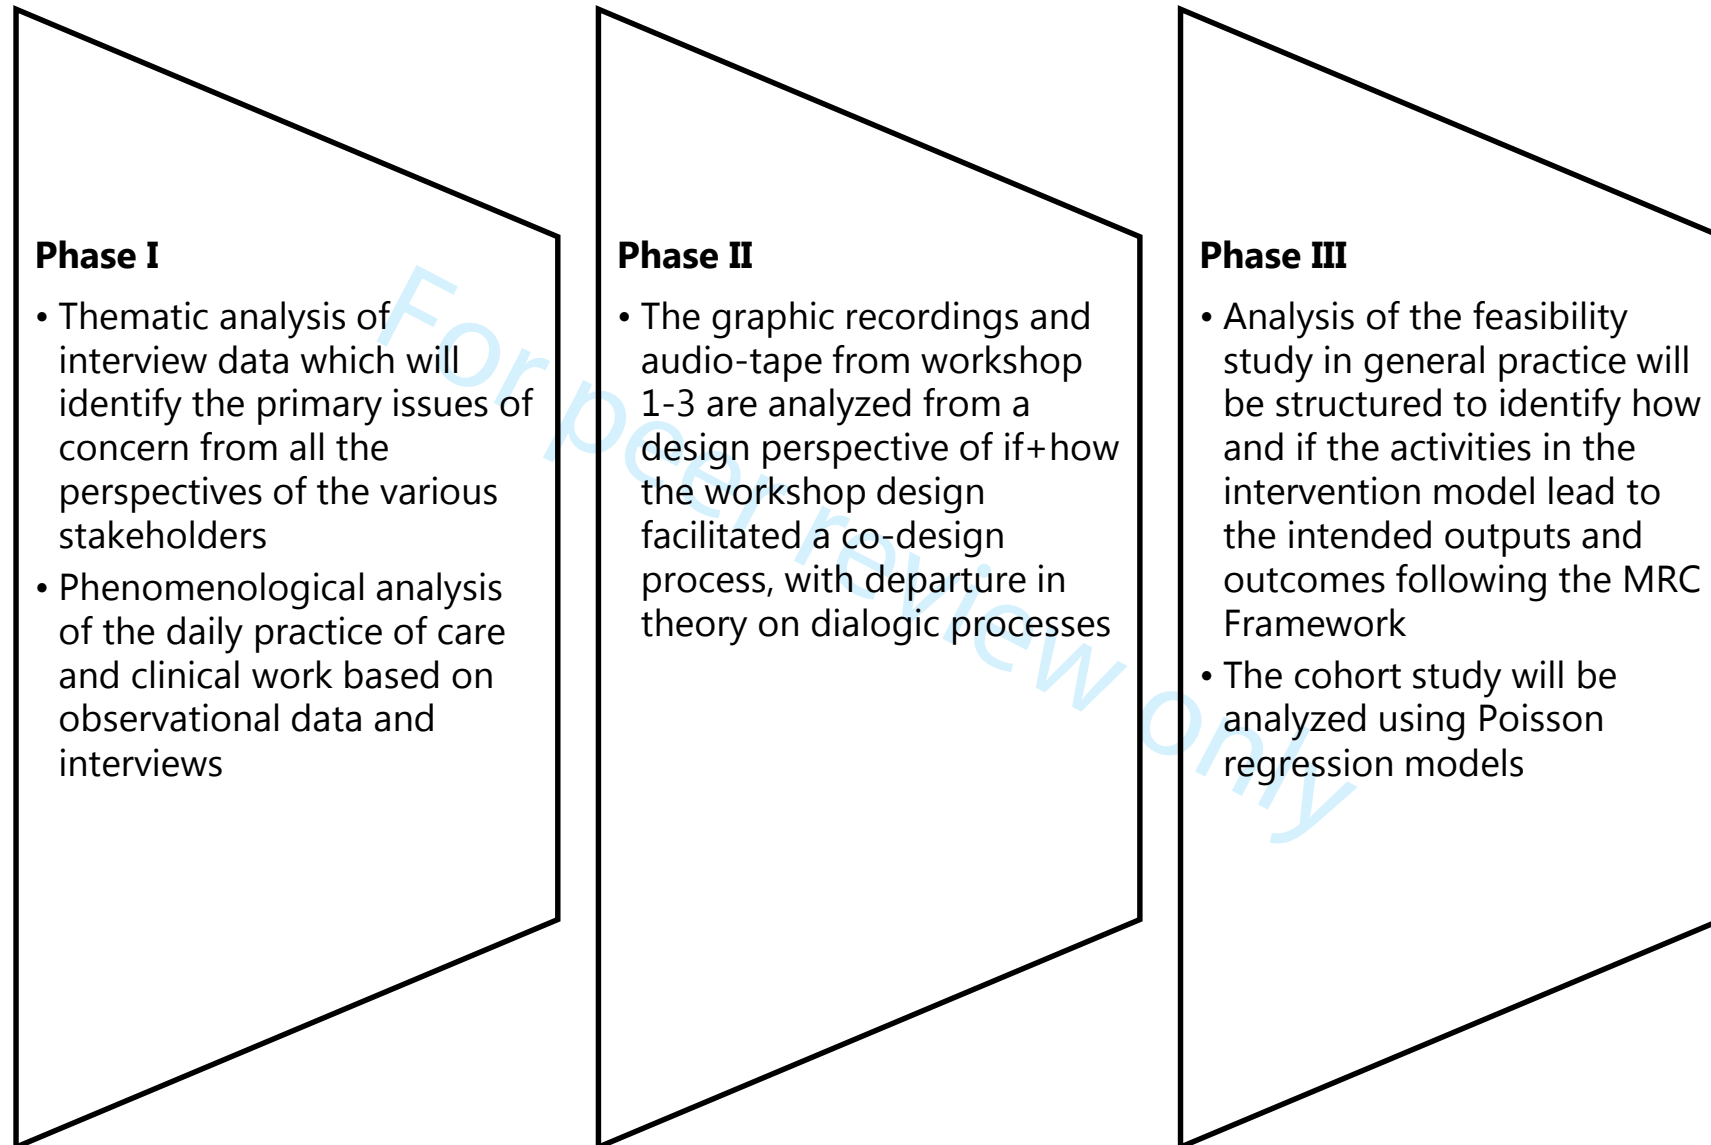

Figure 3: DETECT Analytical steps
